# Supplementary material
Source: publisher figshare collection journal article supplement (https://gsajournals.figshare.com/ndownloader/files/14675420)
Supplement: Supplementary file 1 [file 14675420]

## Sheet: #1
frame	time	PC	TB	ant isth	mid isth	post isth
156	00:00:06.125000
157	00:00:06.165000
158	00:00:06.204000
159	00:00:06.244000
160	00:00:06.283000
161	00:00:06.323000
162	00:00:06.362000
163	00:00:06.402000
164	00:00:06.441000
165	00:00:06.481000
166	00:00:06.520000
167	00:00:06.560000
168	00:00:06.599000
169	00:00:06.639000
170	00:00:06.679000
171	00:00:06.718000
172	00:00:06.758000
173	00:00:06.797000
174	00:00:06.837000
175	00:00:06.876000
176	00:00:06.916000
177	00:00:06.955000
178	00:00:06.995000
179	00:00:07.034000
180	00:00:07.074000
181	00:00:07.113000
182	00:00:07.153000
183	00:00:07.192000
184	00:00:07.232000
185	00:00:07.271000
186	00:00:07.311000
187	00:00:07.350000
188	00:00:07.390000
189	00:00:07.429000
190	00:00:07.469000
191	00:00:07.509000
192	00:00:07.549000
193	00:00:07.588000
194	00:00:07.628000
195	00:00:07.667000
196	00:00:07.707000
197	00:00:07.746000
198	00:00:07.786000
199	00:00:07.825000
200	00:00:07.865000
201	00:00:07.904000
202	00:00:07.944000
203	00:00:07.983000
204	00:00:08.023000
205	00:00:08.062000
206	00:00:08.102000
207	00:00:08.141000
208	00:00:08.181000
209	00:00:08.221000
210	00:00:08.260000
211	00:00:08.300000
212	00:00:08.339000
213	00:00:08.379000
214	00:00:08.418000
215	00:00:08.458000
216	00:00:08.497000
217	00:00:08.537000
218	00:00:08.576000
219	00:00:08.616000
220	00:00:08.655000
221	00:00:08.695000
222	00:00:08.734000
223	00:00:08.774000
224	00:00:08.813000
225	00:00:08.853000
226	00:00:08.892000
227	00:00:08.932000
228	00:00:08.971000
229	00:00:09.011000
230	00:00:09.050000
231	00:00:09.090000
232	00:00:09.129000
233	00:00:09.169000
234	00:00:09.208000
235	00:00:09.248000
236	00:00:09.287000
237	00:00:09.327000
238	00:00:09.366000
239	00:00:09.406000
240	00:00:09.445000
241	00:00:09.485000
242	00:00:09.524000
243	00:00:09.564000
244	00:00:09.603000
245	00:00:09.643000
246	00:00:09.683000
247	00:00:09.722000
248	00:00:09.761000
249	00:00:09.801000
250	00:00:09.841000
251	00:00:09.880000
252	00:00:09.919000
253	00:00:09.959000
254	00:00:09.999000
255	00:00:10.038000
256	00:00:10.078000
257	00:00:10.117000
258	00:00:10.157000
259	00:00:10.196000
260	00:00:10.236000
261	00:00:10.275000
262	00:00:10.315000
263	00:00:10.354000
264	00:00:10.394000
265	00:00:10.433000
266	00:00:10.473000
267	00:00:10.512000
268	00:00:10.552000
269	00:00:10.591000
270	00:00:10.631000
271	00:00:10.670000
272	00:00:10.710000
273	00:00:10.749000
274	00:00:10.789000
275	00:00:10.828000
276	00:00:10.868000
277	00:00:10.907000
278	00:00:10.947000
279	00:00:10.986000
280	00:00:11.026000
281	00:00:11.065000
282	00:00:11.105000
283	00:00:11.144000
284	00:00:11.184000
285	00:00:11.223000
286	00:00:11.263000
287	00:00:11.302000
288	00:00:11.364000
289	00:00:11.384000
290	00:00:11.460000
291	00:00:11.500000
292	00:00:11.540000
293	00:00:11.579000
294	00:00:11.619000
295	00:00:11.658000
296	00:00:11.698000
297	00:00:11.737000
298	00:00:11.777000
299	00:00:11.816000
300	00:00:11.856000
301	00:00:11.895000
302	00:00:11.935000
303	00:00:11.974000
304	00:00:12.014000
305	00:00:12.053000
306	00:00:12.093000
307	00:00:12.132000
308	00:00:12.172000
309	00:00:12.211000
310	00:00:12.251000
311	00:00:12.290000
312	00:00:12.330000
313	00:00:12.369000
314	00:00:12.409000
315	00:00:12.448000
316	00:00:12.488000
317	00:00:12.528000
318	00:00:12.568000
319	00:00:12.607000
320	00:00:12.647000
321	00:00:12.686000
322	00:00:12.726000
323	00:00:12.765000
324	00:00:12.805000
325	00:00:12.844000
326	00:00:12.884000
327	00:00:12.923000
328	00:00:12.963000
329	00:00:13.003000
330	00:00:13.042000
331	00:00:13.082000
332	00:00:13.121000
333	00:00:13.161000
334	00:00:13.200000
335	00:00:13.240000
336	00:00:13.279000
337	00:00:13.319000
338	00:00:13.358000
339	00:00:13.398000
340	00:00:13.437000
341	00:00:13.477000
342	00:00:13.516000
343	00:00:13.556000
344	00:00:13.595000
345	00:00:13.635000
346	00:00:13.674000
347	00:00:13.714000
348	00:00:13.753000
349	00:00:13.793000
350	00:00:13.832000
351	00:00:13.872000
352	00:00:13.911000
353	00:00:13.951000
354	00:00:13.990000
355	00:00:14.030000
356	00:00:14.069000
357	00:00:14.109000
358	00:00:14.148000
359	00:00:14.188000
360	00:00:14.227000
361	00:00:14.267000
362	00:00:14.306000
363	00:00:14.346000
364	00:00:14.385000
365	00:00:14.425000
366	00:00:14.464000
367	00:00:14.504000
368	00:00:14.544000
369	00:00:14.583000
370	00:00:14.622000
371	00:00:14.662000
372	00:00:14.701000
373	00:00:14.741000
374	00:00:14.780000
375	00:00:14.820000
376	00:00:14.860000
377	00:00:14.899000
378	00:00:14.939000
379	00:00:14.978000
380	00:00:15.018000
381	00:00:15.057000
382	00:00:15.097000
383	00:00:15.136000
384	00:00:15.176000
385	00:00:15.215000
386	00:00:15.255000
387	00:00:15.294000
388	00:00:15.334000
389	00:00:15.373000
390	00:00:15.413000
391	00:00:15.452000
392	00:00:15.492000
393	00:00:15.531000
394	00:00:15.571000
395	00:00:15.610000
396	00:00:15.650000
397	00:00:15.689000
398	00:00:15.729000
399	00:00:15.768000
400	00:00:15.808000
401	00:00:15.847000
402	00:00:15.887000
403	00:00:15.926000
404	00:00:15.966000
405	00:00:16.005000
406	00:00:16.045000
407	00:00:16.084000
408	00:00:16.124000
409	00:00:16.163000
410	00:00:16.203000
411	00:00:16.242000
412	00:00:16.282000
413	00:00:16.322000
414	00:00:16.361000
415	00:00:16.401000
416	00:00:16.440000
417	00:00:16.480000
418	00:00:16.519000
419	00:00:16.559000
420	00:00:16.598000
421	00:00:16.638000
422	00:00:16.677000
423	00:00:16.717000
424	00:00:16.756000
425	00:00:16.796000
426	00:00:16.835000
427	00:00:16.875000
428	00:00:16.914000
429	00:00:16.954000
430	00:00:16.993000
431	00:00:17.033000
432	00:00:17.072000
433	00:00:17.112000
434	00:00:17.151000
435	00:00:17.191000
436	00:00:17.230000
437	00:00:17.270000
438	00:00:17.309000
439	00:00:17.349000
440	00:00:17.388000
441	00:00:17.428000
442	00:00:17.467000
443	00:00:17.508000
444	00:00:17.547000
445	00:00:17.587000
446	00:00:17.626000
447	00:00:17.666000
448	00:00:17.705000
449	00:00:17.745000
450	00:00:17.784000
451	00:00:17.824000
452	00:00:17.864000
453	00:00:17.903000
454	00:00:17.943000
455	00:00:17.982000
456	00:00:18.022000
457	00:00:18.061000
458	00:00:18.101000
459	00:00:18.140000
460	00:00:18.180000
461	00:00:18.219000
462	00:00:18.259000
463	00:00:18.298000
464	00:00:18.338000
465	00:00:18.377000
466	00:00:18.417000
467	00:00:18.456000
468	00:00:18.496000
469	00:00:18.535000
470	00:00:18.575000
471	00:00:18.614000
472	00:00:18.654000
473	00:00:18.693000
474	00:00:18.733000
475	00:00:18.772000
476	00:00:18.812000
477	00:00:18.851000
478	00:00:18.891000
479	00:00:18.930000
480	00:00:18.970000
481	00:00:19.009000
482	00:00:19.049000
483	00:00:19.088000
484	00:00:19.128000
485	00:00:19.167000
486	00:00:19.207000
487	00:00:19.246000
488	00:00:19.286000
489	00:00:19.326000
490	00:00:19.365000
491	00:00:19.404000
492	00:00:19.444000
493	00:00:19.483000
494	00:00:19.523000
495	00:00:19.563000
496	00:00:19.602000
497	00:00:19.642000
498	00:00:19.681000
499	00:00:19.721000
500	00:00:19.760000
501	00:00:19.800000
502	00:00:19.839000
503	00:00:19.879000
504	00:00:19.918000
505	00:00:19.958000
506	00:00:19.997000
507	00:00:20.037000
508	00:00:20.076000
509	00:00:20.116000
510	00:00:20.155000
511	00:00:20.195000
512	00:00:20.234000
513	00:00:20.274000
514	00:00:20.313000
515	00:00:20.353000
516	00:00:20.392000
517	00:00:20.432000
518	00:00:20.471000
519	00:00:20.511000
520	00:00:20.550000
521	00:00:20.590000
522	00:00:20.629000
523	00:00:20.669000
524	00:00:20.708000
525	00:00:20.748000
526	00:00:20.787000
527	00:00:20.827000
528	00:00:20.866000
529	00:00:20.906000
530	00:00:20.945000
531	00:00:20.985000
532	00:00:21.024000
533	00:00:21.064000
534	00:00:21.103000
535	00:00:21.143000
536	00:00:21.183000
537	00:00:21.222000
538	00:00:21.262000
539	00:00:21.301000
540	00:00:21.341000
541	00:00:21.380000
542	00:00:21.420000
543	00:00:21.459000
544	00:00:21.499000
545	00:00:21.538000
546	00:00:21.578000
547	00:00:21.617000
548	00:00:21.657000
549	00:00:21.696000
550	00:00:21.736000
551	00:00:21.775000
552	00:00:21.815000
553	00:00:21.854000
554	00:00:21.894000
555	00:00:21.933000
556	00:00:21.973000
557	00:00:22.012000
558	00:00:22.052000
559	00:00:22.091000
560	00:00:22.131000
561	00:00:22.170000
562	00:00:22.210000
563	00:00:22.249000
564	00:00:22.289000
565	00:00:22.328000
566	00:00:22.368000
567	00:00:22.407000
568	00:00:22.447000
569	00:00:22.486000
570	00:00:22.527000
571	00:00:22.566000
572	00:00:22.606000
573	00:00:22.646000
574	00:00:22.685000
575	00:00:22.725000
576	00:00:22.764000
577	00:00:22.804000
578	00:00:22.843000
579	00:00:22.883000
580	00:00:22.922000
581	00:00:22.962000
582	00:00:23.001000
583	00:00:23.041000
584	00:00:23.080000
585	00:00:23.120000
586	00:00:23.159000
587	00:00:23.199000
588	00:00:23.238000
589	00:00:23.278000
590	00:00:23.317000
591	00:00:23.357000
592	00:00:23.396000
593	00:00:23.436000
594	00:00:23.475000
595	00:00:23.515000
596	00:00:23.554000
597	00:00:23.594000
598	00:00:23.633000
599	00:00:23.673000
600	00:00:23.712000
601	00:00:23.752000
602	00:00:23.791000
603	00:00:23.831000
604	00:00:23.870000
605	00:00:23.910000
606	00:00:23.949000
607	00:00:23.989000
608	00:00:24.028000
609	00:00:24.068000
610	00:00:24.107000
611	00:00:24.147000
612	00:00:24.187000
613	00:00:24.226000
614	00:00:24.266000
615	00:00:24.305000
616	00:00:24.344000
617	00:00:24.384000
618	00:00:24.424000
619	00:00:24.463000
620	00:00:24.503000
621	00:00:24.542000
622	00:00:24.582000
623	00:00:24.621000
624	00:00:24.661000
625	00:00:24.700000
626	00:00:24.740000
627	00:00:24.779000
628	00:00:24.819000
629	00:00:24.858000
630	00:00:24.898000
631	00:00:24.937000
632	00:00:24.977000
633	00:00:25.016000
634	00:00:25.056000
635	00:00:25.095000
636	00:00:25.135000
637	00:00:25.174000
638	00:00:25.214000
639	00:00:25.253000
640	00:00:25.293000
641	00:00:25.332000
642	00:00:25.372000
643	00:00:25.411000
644	00:00:25.451000
645	00:00:25.490000
646	00:00:25.530000
647	00:00:25.569000
648	00:00:25.609000
649	00:00:25.648000
650	00:00:25.688000
651	00:00:25.727000
652	00:00:25.767000
653	00:00:25.806000
654	00:00:25.846000
655	00:00:25.885000
656	00:00:25.925000
657	00:00:25.965000
658	00:00:26.004000
659	00:00:26.044000
660	00:00:26.083000
661	00:00:26.123000
662	00:00:26.162000
663	00:00:26.202000
664	00:00:26.241000
665	00:00:26.281000
666	00:00:26.320000
667	00:00:26.360000
668	00:00:26.399000
669	00:00:26.439000
670	00:00:26.478000
671	00:00:26.518000
672	00:00:26.557000
673	00:00:26.597000
674	00:00:26.636000
675	00:00:26.676000
676	00:00:26.715000
677	00:00:26.755000
678	00:00:26.794000
679	00:00:26.834000
680	00:00:26.873000
681	00:00:26.913000
682	00:00:26.952000
683	00:00:26.992000
684	00:00:27.031000
685	00:00:27.071000
686	00:00:27.110000
687	00:00:27.150000
688	00:00:27.189000
689	00:00:27.229000
690	00:00:27.268000
691	00:00:27.308000
692	00:00:27.347000
693	00:00:27.387000
694	00:00:27.426000
695	00:00:27.466000
696	00:00:27.507000
697	00:00:27.546000
698	00:00:27.586000
699	00:00:27.625000
700	00:00:27.665000
701	00:00:27.704000
702	00:00:27.744000
703	00:00:27.783000
704	00:00:27.823000
705	00:00:27.862000
706	00:00:27.902000
707	00:00:27.941000
708	00:00:27.981000
709	00:00:28.020000
710	00:00:28.060000
711	00:00:28.099000
712	00:00:28.139000
713	00:00:28.178000
714	00:00:28.218000
715	00:00:28.257000
716	00:00:28.297000
717	00:00:28.336000
718	00:00:28.376000
719	00:00:28.415000
720	00:00:28.455000
721	00:00:28.494000
722	00:00:28.534000
723	00:00:28.573000
724	00:00:28.613000
725	00:00:28.652000
726	00:00:28.692000
727	00:00:28.731000
728	00:00:28.771000
729	00:00:28.810000
730	00:00:28.850000
731	00:00:28.889000
732	00:00:28.929000
733	00:00:28.968000
734	00:00:29.008000
735	00:00:29.048000
736	00:00:29.087000
737	00:00:29.127000
738	00:00:29.166000
739	00:00:29.206000
740	00:00:29.245000
741	00:00:29.285000
742	00:00:29.324000
743	00:00:29.364000
744	00:00:29.403000
745	00:00:29.443000
746	00:00:29.482000
747	00:00:29.522000
748	00:00:29.561000
749	00:00:29.601000
750	00:00:29.640000
751	00:00:29.680000
752	00:00:29.719000
753	00:00:29.759000
754	00:00:29.798000
755	00:00:29.838000
756	00:00:29.877000
757	00:00:29.917000
758	00:00:29.956000
759	00:00:29.996000
760	00:00:30.035000
761	00:00:30.075000
762	00:00:30.114000
763	00:00:30.154000
764	00:00:30.193000
765	00:00:30.233000
766	00:00:30.272000
767	00:00:30.312000
768	00:00:30.351000
769	00:00:30.391000
770	00:00:30.430000
771	00:00:30.470000
772	00:00:30.509000
773	00:00:30.549000
774	00:00:30.588000
775	00:00:30.628000
776	00:00:30.667000
777	00:00:30.707000
778	00:00:30.746000
779	00:00:30.786000
780	00:00:30.826000
781	00:00:30.865000
782	00:00:30.905000
783	00:00:30.944000
784	00:00:30.984000
785	00:00:31.023000
786	00:00:31.063000
787	00:00:31.102000
788	00:00:31.142000
789	00:00:31.181000
790	00:00:31.221000
791	00:00:31.260000
792	00:00:31.300000
793	00:00:31.339000
794	00:00:31.379000
795	00:00:31.418000
796	00:00:31.458000
797	00:00:31.497000
798	00:00:31.537000
799	00:00:31.576000
800	00:00:31.616000
801	00:00:31.655000
802	00:00:31.695000
803	00:00:31.734000
804	00:00:31.774000
805	00:00:31.813000
806	00:00:31.853000
807	00:00:31.892000
808	00:00:31.932000
809	00:00:31.971000
810	00:00:32.011000
811	00:00:32.050000
812	00:00:32.090000
813	00:00:32.129000
814	00:00:32.169000
815	00:00:32.208000
816	00:00:32.248000
817	00:00:32.287000
818	00:00:32.327000
819	00:00:32.367000
820	00:00:32.406000
821	00:00:32.446000
822	00:00:32.485000
823	00:00:32.526000
824	00:00:32.565000
825	00:00:32.605000
826	00:00:32.644000
827	00:00:32.684000
828	00:00:32.723000
829	00:00:32.763000
830	00:00:32.802000
831	00:00:32.842000
832	00:00:32.881000
833	00:00:32.921000
834	00:00:32.960000
835	00:00:33
836	00:00:33.039000
837	00:00:33.079000
838	00:00:33.118000
839	00:00:33.158000
840	00:00:33.197000
841	00:00:33.237000
842	00:00:33.276000
843	00:00:33.316000
844	00:00:33.355000
845	00:00:33.395000
846	00:00:33.434000
847	00:00:33.474000
848	00:00:33.513000
849	00:00:33.553000
850	00:00:33.592000
851	00:00:33.632000
852	00:00:33.671000
853	00:00:33.711000
854	00:00:33.750000
855	00:00:33.790000
856	00:00:33.830000
857	00:00:33.869000
858	00:00:33.909000
859	00:00:33.948000
860	00:00:33.987000
861	00:00:34.027000
862	00:00:34.066000
863	00:00:34.106000
864	00:00:34.146000
865	00:00:34.185000
866	00:00:34.225000
867	00:00:34.264000
868	00:00:34.304000
869	00:00:34.343000
870	00:00:34.383000
871	00:00:34.422000
872	00:00:34.462000
873	00:00:34.501000
874	00:00:34.541000
875	00:00:34.580000
876	00:00:34.620000
877	00:00:34.659000
878	00:00:34.699000
879	00:00:34.738000
880	00:00:34.778000
881	00:00:34.817000
882	00:00:34.857000
883	00:00:34.896000
884	00:00:34.936000
885	00:00:34.975000
886	00:00:35.015000
887	00:00:35.054000
888	00:00:35.094000
889	00:00:35.133000
890	00:00:35.173000
891	00:00:35.212000
892	00:00:35.252000
893	00:00:35.291000
894	00:00:35.331000
895	00:00:35.370000
896	00:00:35.410000
897	00:00:35.449000
898	00:00:35.489000
899	00:00:35.528000
900	00:00:35.568000
901	00:00:35.607000
902	00:00:35.647000
903	00:00:35.687000
904	00:00:35.726000
905	00:00:35.766000
906	00:00:35.805000
907	00:00:35.845000
908	00:00:35.884000
909	00:00:35.924000
910	00:00:35.963000
911	00:00:36.003000
912	00:00:36.042000
913	00:00:36.082000
914	00:00:36.121000
915	00:00:36.161000
916	00:00:36.200000
917	00:00:36.240000
918	00:00:36.279000
919	00:00:36.319000
920	00:00:36.358000
921	00:00:36.398000
922	00:00:36.437000
923	00:00:36.477000
924	00:00:36.516000
925	00:00:36.556000
926	00:00:36.595000
927	00:00:36.635000
928	00:00:36.674000
929	00:00:36.714000
930	00:00:36.753000
931	00:00:36.793000
932	00:00:36.832000
933	00:00:36.872000
934	00:00:36.911000
935	00:00:36.951000
936	00:00:36.990000
937	00:00:37.030000
938	00:00:37.069000
939	00:00:37.109000
940	00:00:37.149000
941	00:00:37.188000
942	00:00:37.228000
943	00:00:37.267000
944	00:00:37.307000
945	00:00:37.346000
946	00:00:37.386000
947	00:00:37.425000
948	00:00:37.465000
949	00:00:37.504000
950	00:00:37.545000
951	00:00:37.584000
952	00:00:37.624000
953	00:00:37.663000
954	00:00:37.703000
955	00:00:37.742000
956	00:00:37.782000
957	00:00:37.821000
958	00:00:37.861000
959	00:00:37.900000
960	00:00:37.940000
961	00:00:37.979000
962	00:00:38.019000
963	00:00:38.058000
964	00:00:38.098000
965	00:00:38.137000
966	00:00:38.177000
967	00:00:38.216000
968	00:00:38.256000
969	00:00:38.295000
970	00:00:38.335000
971	00:00:38.374000
972	00:00:38.414000
973	00:00:38.453000
974	00:00:38.493000
975	00:00:38.532000
976	00:00:38.572000
977	00:00:38.611000
978	00:00:38.651000
979	00:00:38.691000
980	00:00:38.730000
981	00:00:38.770000
982	00:00:38.809000
983	00:00:38.849000
984	00:00:38.888000
985	00:00:38.927000
986	00:00:38.967000
987	00:00:39.007000
988	00:00:39.046000
989	00:00:39.086000
990	00:00:39.125000
991	00:00:39.165000
992	00:00:39.204000
993	00:00:39.244000
994	00:00:39.283000
995	00:00:39.323000
996	00:00:39.362000
997	00:00:39.402000
998	00:00:39.441000
999	00:00:39.481000
1000	00:00:39.520000
1001	00:00:39.560000
1002	00:00:39.599000
1003	00:00:39.639000
1004	00:00:39.678000
1005	00:00:39.718000
1006	00:00:39.757000
1007	00:00:39.797000
1008	00:00:39.836000
1009	00:00:39.876000
1010	00:00:39.915000
1011	00:00:39.955000
1012	00:00:39.994000
1013	00:00:40.034000
1014	00:00:40.073000
1015	00:00:40.113000
1016	00:00:40.152000
1017	00:00:40.192000
1018	00:00:40.231000
1019	00:00:40.271000
1020	00:00:40.310000
1021	00:00:40.350000
1022	00:00:40.389000
1023	00:00:40.429000
1024	00:00:40.469000
1025	00:00:40.508000
1026	00:00:40.548000
1027	00:00:40.587000
1028	00:00:40.627000
1029	00:00:40.666000
1030	00:00:40.706000
1031	00:00:40.745000
1032	00:00:40.785000
1033	00:00:40.824000
1034	00:00:40.864000
1035	00:00:40.903000
1036	00:00:40.943000
1037	00:00:40.982000
1038	00:00:41.022000
1039	00:00:41.061000
1040	00:00:41.101000
1041	00:00:41.140000
1042	00:00:41.180000
1043	00:00:41.219000
1044	00:00:41.259000
1045	00:00:41.298000
1046	00:00:41.338000
1047	00:00:41.377000
1048	00:00:41.417000
1049	00:00:41.456000
1050	00:00:41.496000
1051	00:00:41.535000
1052	00:00:41.575000
1053	00:00:41.614000
1054	00:00:41.654000
1055	00:00:41.693000
1056	00:00:41.733000
1057	00:00:41.772000
1058	00:00:41.812000
1059	00:00:41.851000
1060	00:00:41.891000
1061	00:00:41.930000
1062	00:00:41.970000
1063	00:00:42.010000
1064	00:00:42.049000
1065	00:00:42.089000
1066	00:00:42.128000
1067	00:00:42.168000
1068	00:00:42.207000
1069	00:00:42.247000
1070	00:00:42.286000
1071	00:00:42.326000
1072	00:00:42.365000
1073	00:00:42.405000
1074	00:00:42.444000
1075	00:00:42.484000
1076	00:00:42.524000
1077	00:00:42.564000
1078	00:00:42.603000
1079	00:00:42.643000
1080	00:00:42.682000
1081	00:00:42.722000
1082	00:00:42.761000
1083	00:00:42.801000
1084	00:00:42.840000
1085	00:00:42.880000
1086	00:00:42.919000
1087	00:00:42.959000
1088	00:00:42.998000
1089	00:00:43.038000
1090	00:00:43.077000
1091	00:00:43.117000
1092	00:00:43.156000
1093	00:00:43.196000
1094	00:00:43.235000
1095	00:00:43.275000
1096	00:00:43.314000
1097	00:00:43.354000
1098	00:00:43.393000
1099	00:00:43.433000
1100	00:00:43.472000
1101	00:00:43.512000
1102	00:00:43.552000
1103	00:00:43.591000
1104	00:00:43.631000
1105	00:00:43.670000
1106	00:00:43.709000
1107	00:00:43.749000
1108	00:00:43.789000
1109	00:00:43.828000
1110	00:00:43.868000
1111	00:00:43.907000
1112	00:00:43.947000
1113	00:00:43.986000
1114	00:00:44.026000
1115	00:00:44.065000
1116	00:00:44.105000
1117	00:00:44.144000
1118	00:00:44.184000
1119	00:00:44.223000
1120	00:00:44.263000
1121	00:00:44.302000
1122	00:00:44.342000
1123	00:00:44.381000
1124	00:00:44.421000
1125	00:00:44.460000
1126	00:00:44.500000
1127	00:00:44.539000
1128	00:00:44.579000
1129	00:00:44.618000
1130	00:00:44.658000
1131	00:00:44.697000
1132	00:00:44.737000
1133	00:00:44.776000
1134	00:00:44.816000
1135	00:00:44.855000
1136	00:00:44.895000
1137	00:00:44.934000
1138	00:00:44.974000
1139	00:00:45.013000
1140	00:00:45.053000
1141	00:00:45.092000
1142	00:00:45.132000
1143	00:00:45.171000
1144	00:00:45.211000
1145	00:00:45.250000
1146	00:00:45.290000
1147	00:00:45.330000
1148	00:00:45.369000
1149	00:00:45.409000
1150	00:00:45.448000
1151	00:00:45.488000
1152	00:00:45.527000
1153	00:00:45.567000
1154	00:00:45.606000
1155	00:00:45.646000
1156	00:00:45.685000
1157	00:00:45.725000
1158	00:00:45.764000
1159	00:00:45.804000
1160	00:00:45.843000
1161	00:00:45.883000
1162	00:00:45.922000
1163	00:00:45.962000
1164	00:00:46.001000
1165	00:00:46.041000
1166	00:00:46.080000
1167	00:00:46.120000
1168	00:00:46.159000
1169	00:00:46.199000
1170	00:00:46.238000
1171	00:00:46.278000
1172	00:00:46.317000
1173	00:00:46.357000
1174	00:00:46.396000
1175	00:00:46.436000
1176	00:00:46.475000
1177	00:00:46.515000
1178	00:00:46.554000
1179	00:00:46.594000
1180	00:00:46.633000
1181	00:00:46.673000
1182	00:00:46.712000
1183	00:00:46.752000
1184	00:00:46.791000

## Sheet: #2
frame	time	PC	TB	ant isth	mid isth	post isth
231	00:00:09.089000
232	00:00:09.128000
233	00:00:09.168000
234	00:00:09.207000
235	00:00:09.247000
236	00:00:09.286000
237	00:00:09.326000
238	00:00:09.365000
239	00:00:09.405000
240	00:00:09.444000
241	00:00:09.484000
242	00:00:09.523000
243	00:00:09.563000
244	00:00:09.602000
245	00:00:09.642000
246	00:00:09.682000
247	00:00:09.721000
248	00:00:09.761000
249	00:00:09.800000
250	00:00:09.840000
251	00:00:09.879000
252	00:00:09.919000
253	00:00:09.958000
254	00:00:09.998000
255	00:00:10.037000
256	00:00:10.077000
257	00:00:10.116000
258	00:00:10.156000
259	00:00:10.195000
260	00:00:10.235000
261	00:00:10.274000
262	00:00:10.314000
263	00:00:10.353000
264	00:00:10.393000
265	00:00:10.432000
266	00:00:10.472000
267	00:00:10.511000
268	00:00:10.551000
269	00:00:10.590000
270	00:00:10.630000
271	00:00:10.669000
272	00:00:10.709000
273	00:00:10.748000
274	00:00:10.788000
275	00:00:10.827000
276	00:00:10.867000
277	00:00:10.906000
278	00:00:10.946000
279	00:00:10.985000
280	00:00:11.025000
281	00:00:11.064000
282	00:00:11.104000
283	00:00:11.143000
284	00:00:11.183000
285	00:00:11.224000
286	00:00:11.263000
287	00:00:11.303000
288	00:00:11.342000
289	00:00:11.382000
290	00:00:11.421000
291	00:00:11.461000
292	00:00:11.500000
293	00:00:11.540000
294	00:00:11.579000
295	00:00:11.619000
296	00:00:11.658000
297	00:00:11.698000
298	00:00:11.737000
299	00:00:11.777000
300	00:00:11.816000
301	00:00:11.856000
302	00:00:11.895000
303	00:00:11.935000
304	00:00:11.974000
305	00:00:12.014000
306	00:00:12.053000
307	00:00:12.093000
308	00:00:12.132000
309	00:00:12.172000
310	00:00:12.211000
311	00:00:12.251000
312	00:00:12.290000
313	00:00:12.330000
314	00:00:12.369000
315	00:00:12.409000
316	00:00:12.448000
317	00:00:12.488000
318	00:00:12.527000
319	00:00:12.567000
320	00:00:12.606000
321	00:00:12.646000
322	00:00:12.685000
323	00:00:12.725000
324	00:00:12.764000
325	00:00:12.804000
326	00:00:12.843000
327	00:00:12.883000
328	00:00:12.922000
329	00:00:12.962000
330	00:00:13.002000
331	00:00:13.041000
332	00:00:13.081000
333	00:00:13.120000
334	00:00:13.160000
335	00:00:13.199000
336	00:00:13.239000
337	00:00:13.278000
338	00:00:13.318000
339	00:00:13.357000
340	00:00:13.397000
341	00:00:13.436000
342	00:00:13.476000
343	00:00:13.515000
344	00:00:13.555000
345	00:00:13.594000
346	00:00:13.634000
347	00:00:13.673000
348	00:00:13.713000
349	00:00:13.752000
350	00:00:13.792000
351	00:00:13.831000
352	00:00:13.871000
353	00:00:13.910000
354	00:00:13.950000
355	00:00:13.989000
356	00:00:14.029000
357	00:00:14.068000
358	00:00:14.108000
359	00:00:14.147000
360	00:00:14.187000
361	00:00:14.226000
362	00:00:14.266000
363	00:00:14.305000
364	00:00:14.345000
365	00:00:14.384000
366	00:00:14.424000
367	00:00:14.463000
368	00:00:14.503000
369	00:00:14.543000
370	00:00:14.582000
371	00:00:14.622000
372	00:00:14.661000
373	00:00:14.701000
374	00:00:14.740000
375	00:00:14.780000
376	00:00:14.819000
377	00:00:14.859000
378	00:00:14.898000
379	00:00:14.938000
380	00:00:14.977000
381	00:00:15.017000
382	00:00:15.056000
383	00:00:15.096000
384	00:00:15.135000
385	00:00:15.175000
386	00:00:15.214000
387	00:00:15.254000
388	00:00:15.293000
389	00:00:15.333000
390	00:00:15.372000
391	00:00:15.412000
392	00:00:15.451000
393	00:00:15.491000
394	00:00:15.530000
395	00:00:15.570000
396	00:00:15.609000
397	00:00:15.649000
398	00:00:15.688000
399	00:00:15.728000
400	00:00:15.767000
401	00:00:15.807000
402	00:00:15.846000
403	00:00:15.886000
404	00:00:15.925000
405	00:00:15.965000
406	00:00:16.004000
407	00:00:16.044000
408	00:00:16.084000
409	00:00:16.123000
410	00:00:16.163000
411	00:00:16.202000
412	00:00:16.242000
413	00:00:16.281000
414	00:00:16.321000
415	00:00:16.360000
416	00:00:16.400000
417	00:00:16.439000
418	00:00:16.479000
419	00:00:16.518000
420	00:00:16.558000
421	00:00:16.597000
422	00:00:16.637000
423	00:00:16.676000
424	00:00:16.716000
425	00:00:16.755000
426	00:00:16.795000
427	00:00:16.834000
428	00:00:16.874000
429	00:00:16.913000
430	00:00:16.953000
431	00:00:16.992000
432	00:00:17.032000
433	00:00:17.071000
434	00:00:17.111000
435	00:00:17.150000
436	00:00:17.190000
437	00:00:17.229000
438	00:00:17.269000
439	00:00:17.308000
440	00:00:17.348000
441	00:00:17.387000
442	00:00:17.427000
443	00:00:17.466000
444	00:00:17.506000
445	00:00:17.546000
446	00:00:17.585000
447	00:00:17.624000
448	00:00:17.664000
449	00:00:17.703000
450	00:00:17.743000
451	00:00:17.782000
452	00:00:17.822000
453	00:00:17.862000
454	00:00:17.901000
455	00:00:17.941000
456	00:00:17.980000
457	00:00:18.020000
458	00:00:18.059000
459	00:00:18.099000
460	00:00:18.138000
461	00:00:18.178000
462	00:00:18.217000
463	00:00:18.257000
464	00:00:18.296000
465	00:00:18.336000
466	00:00:18.375000
467	00:00:18.415000
468	00:00:18.454000
469	00:00:18.494000
470	00:00:18.533000
471	00:00:18.573000
472	00:00:18.612000
473	00:00:18.652000
474	00:00:18.691000
475	00:00:18.731000
476	00:00:18.770000
477	00:00:18.810000
478	00:00:18.849000
479	00:00:18.889000
480	00:00:18.928000
481	00:00:18.968000
482	00:00:19.007000
483	00:00:19.047000
484	00:00:19.086000
485	00:00:19.126000
486	00:00:19.165000
487	00:00:19.205000
488	00:00:19.244000
489	00:00:19.284000
490	00:00:19.323000
491	00:00:19.363000
492	00:00:19.403000
493	00:00:19.442000
494	00:00:19.482000
495	00:00:19.521000
496	00:00:19.561000
497	00:00:19.600000
498	00:00:19.640000
499	00:00:19.679000
500	00:00:19.719000
501	00:00:19.758000
502	00:00:19.798000
503	00:00:19.837000
504	00:00:19.877000
505	00:00:19.916000
506	00:00:19.956000
507	00:00:19.995000
508	00:00:20.035000
509	00:00:20.074000
510	00:00:20.114000
511	00:00:20.153000
512	00:00:20.193000
513	00:00:20.232000
514	00:00:20.272000
515	00:00:20.311000
516	00:00:20.351000
517	00:00:20.390000
518	00:00:20.430000
519	00:00:20.469000
520	00:00:20.509000
521	00:00:20.548000
522	00:00:20.588000
523	00:00:20.627000
524	00:00:20.667000
525	00:00:20.706000
526	00:00:20.746000
527	00:00:20.785000
528	00:00:20.825000
529	00:00:20.865000
530	00:00:20.904000
531	00:00:20.944000
532	00:00:20.983000
533	00:00:21.023000
534	00:00:21.062000
535	00:00:21.102000
536	00:00:21.141000
537	00:00:21.181000
538	00:00:21.221000
539	00:00:21.261000
540	00:00:21.300000
541	00:00:21.340000
542	00:00:21.379000
543	00:00:21.419000
544	00:00:21.458000
545	00:00:21.498000
546	00:00:21.537000
547	00:00:21.577000
548	00:00:21.616000
549	00:00:21.656000
550	00:00:21.695000
551	00:00:21.735000
552	00:00:21.774000
553	00:00:21.814000
554	00:00:21.853000
555	00:00:21.893000
556	00:00:21.932000
557	00:00:21.972000
558	00:00:22.011000
559	00:00:22.051000
560	00:00:22.090000
561	00:00:22.130000
562	00:00:22.169000
563	00:00:22.209000
564	00:00:22.248000
565	00:00:22.288000
566	00:00:22.327000
567	00:00:22.367000
568	00:00:22.407000
569	00:00:22.446000
570	00:00:22.485000
571	00:00:22.525000
572	00:00:22.565000
573	00:00:22.604000
574	00:00:22.643000
575	00:00:22.683000
576	00:00:22.723000
577	00:00:22.762000
578	00:00:22.802000
579	00:00:22.841000
580	00:00:22.881000
581	00:00:22.920000
582	00:00:22.960000
583	00:00:22.999000
584	00:00:23.039000
585	00:00:23.078000
586	00:00:23.118000
587	00:00:23.157000
588	00:00:23.197000
589	00:00:23.236000
590	00:00:23.276000
591	00:00:23.315000
592	00:00:23.355000
593	00:00:23.394000
594	00:00:23.434000
595	00:00:23.473000
596	00:00:23.513000
597	00:00:23.552000
598	00:00:23.592000
599	00:00:23.631000
600	00:00:23.671000
601	00:00:23.710000
602	00:00:23.750000
603	00:00:23.789000
604	00:00:23.829000
605	00:00:23.868000
606	00:00:23.908000
607	00:00:23.947000
608	00:00:23.987000
609	00:00:24.026000
610	00:00:24.066000
611	00:00:24.105000
612	00:00:24.145000
613	00:00:24.185000
614	00:00:24.224000
615	00:00:24.264000
616	00:00:24.303000
617	00:00:24.343000
618	00:00:24.382000
619	00:00:24.422000
620	00:00:24.461000
621	00:00:24.501000
622	00:00:24.540000
623	00:00:24.580000
624	00:00:24.619000
625	00:00:24.659000
626	00:00:24.698000
627	00:00:24.738000
628	00:00:24.777000
629	00:00:24.817000
630	00:00:24.856000
631	00:00:24.896000
632	00:00:24.935000
633	00:00:24.975000
634	00:00:25.014000
635	00:00:25.054000
636	00:00:25.093000
637	00:00:25.133000
638	00:00:25.172000
639	00:00:25.212000
640	00:00:25.251000
641	00:00:25.291000
642	00:00:25.330000
643	00:00:25.370000
644	00:00:25.409000
645	00:00:25.449000
646	00:00:25.488000
647	00:00:25.528000
648	00:00:25.567000
649	00:00:25.607000
650	00:00:25.646000
651	00:00:25.686000
652	00:00:25.726000
653	00:00:25.765000
654	00:00:25.805000
655	00:00:25.844000
656	00:00:25.884000
657	00:00:25.923000
658	00:00:25.962000
659	00:00:26.002000
660	00:00:26.042000
661	00:00:26.081000
662	00:00:26.121000
663	00:00:26.160000
664	00:00:26.200000
665	00:00:26.239000
666	00:00:26.279000
667	00:00:26.318000
668	00:00:26.358000
669	00:00:26.397000
670	00:00:26.437000
671	00:00:26.476000
672	00:00:26.516000
673	00:00:26.555000
674	00:00:26.595000
675	00:00:26.634000
676	00:00:26.674000
677	00:00:26.713000
678	00:00:26.753000
679	00:00:26.792000
680	00:00:26.832000
681	00:00:26.871000
682	00:00:26.911000
683	00:00:26.950000
684	00:00:26.990000
685	00:00:27.029000
686	00:00:27.069000
687	00:00:27.108000
688	00:00:27.148000
689	00:00:27.188000
690	00:00:27.227000
691	00:00:27.266000
692	00:00:27.306000
693	00:00:27.345000
694	00:00:27.385000
695	00:00:27.424000
696	00:00:27.464000
697	00:00:27.504000
698	00:00:27.543000
699	00:00:27.583000
700	00:00:27.622000
701	00:00:27.662000
702	00:00:27.701000
703	00:00:27.741000
704	00:00:27.780000
705	00:00:27.820000
706	00:00:27.859000
707	00:00:27.899000
708	00:00:27.938000
709	00:00:27.978000
710	00:00:28.017000
711	00:00:28.057000
712	00:00:28.096000
713	00:00:28.136000
714	00:00:28.175000
715	00:00:28.215000
716	00:00:28.254000
717	00:00:28.294000
718	00:00:28.333000
719	00:00:28.373000
720	00:00:28.412000
721	00:00:28.452000
722	00:00:28.491000
723	00:00:28.531000
724	00:00:28.570000
725	00:00:28.610000
726	00:00:28.649000
727	00:00:28.689000
728	00:00:28.728000
729	00:00:28.768000
730	00:00:28.807000
731	00:00:28.847000
732	00:00:28.886000
733	00:00:28.926000
734	00:00:28.965000
735	00:00:29.005000
736	00:00:29.045000
737	00:00:29.084000
738	00:00:29.124000
739	00:00:29.163000
740	00:00:29.203000
741	00:00:29.242000
742	00:00:29.282000
743	00:00:29.321000
744	00:00:29.361000
745	00:00:29.400000
746	00:00:29.440000
747	00:00:29.479000
748	00:00:29.519000
749	00:00:29.558000
750	00:00:29.598000
751	00:00:29.637000
752	00:00:29.677000
753	00:00:29.716000
754	00:00:29.756000
755	00:00:29.795000
756	00:00:29.835000
757	00:00:29.874000
758	00:00:29.914000
759	00:00:29.953000
760	00:00:29.993000
761	00:00:30.032000
762	00:00:30.072000
763	00:00:30.111000
764	00:00:30.151000
765	00:00:30.190000
766	00:00:30.230000
767	00:00:30.269000
768	00:00:30.309000
769	00:00:30.348000
770	00:00:30.388000
771	00:00:30.427000
772	00:00:30.467000
773	00:00:30.507000
774	00:00:30.546000
775	00:00:30.586000
776	00:00:30.625000
777	00:00:30.665000
778	00:00:30.704000
779	00:00:30.744000
780	00:00:30.783000
781	00:00:30.823000
782	00:00:30.862000
783	00:00:30.902000
784	00:00:30.941000
785	00:00:30.981000
786	00:00:31.020000
787	00:00:31.060000
788	00:00:31.099000
789	00:00:31.139000
790	00:00:31.178000
791	00:00:31.219000
792	00:00:31.258000
793	00:00:31.298000
794	00:00:31.337000
795	00:00:31.377000
796	00:00:31.416000
797	00:00:31.456000
798	00:00:31.495000
799	00:00:31.535000
800	00:00:31.574000
801	00:00:31.614000
802	00:00:31.653000
803	00:00:31.693000
804	00:00:31.732000
805	00:00:31.772000
806	00:00:31.811000
807	00:00:31.851000
808	00:00:31.890000
809	00:00:31.930000
810	00:00:31.969000
811	00:00:32.009000
812	00:00:32.049000
813	00:00:32.088000
814	00:00:32.127000
815	00:00:32.167000
816	00:00:32.206000
817	00:00:32.246000
818	00:00:32.285000
819	00:00:32.325000
820	00:00:32.365000
821	00:00:32.404000
822	00:00:32.444000
823	00:00:32.483000
824	00:00:32.523000
825	00:00:32.562000
826	00:00:32.602000
827	00:00:32.641000
828	00:00:32.681000
829	00:00:32.720000
830	00:00:32.760000
831	00:00:32.799000
832	00:00:32.839000
833	00:00:32.878000
834	00:00:32.918000
835	00:00:32.957000
836	00:00:32.997000
837	00:00:33.036000
838	00:00:33.076000
839	00:00:33.115000
840	00:00:33.155000
841	00:00:33.194000
842	00:00:33.234000
843	00:00:33.273000
844	00:00:33.313000
845	00:00:33.352000
846	00:00:33.392000
847	00:00:33.431000
848	00:00:33.471000
849	00:00:33.510000
850	00:00:33.550000
851	00:00:33.589000
852	00:00:33.629000
853	00:00:33.668000
854	00:00:33.708000
855	00:00:33.747000
856	00:00:33.787000
857	00:00:33.826000
858	00:00:33.866000
859	00:00:33.906000
860	00:00:33.945000
861	00:00:33.985000
862	00:00:34.024000
863	00:00:34.064000
864	00:00:34.103000
865	00:00:34.143000
866	00:00:34.182000
867	00:00:34.222000
868	00:00:34.261000
869	00:00:34.301000
870	00:00:34.340000
871	00:00:34.380000
872	00:00:34.419000
873	00:00:34.459000
874	00:00:34.498000
875	00:00:34.538000
876	00:00:34.577000
877	00:00:34.617000
878	00:00:34.656000
879	00:00:34.696000
880	00:00:34.735000
881	00:00:34.775000
882	00:00:34.814000
883	00:00:34.854000
884	00:00:34.893000
885	00:00:34.933000
886	00:00:34.972000
887	00:00:35.012000
888	00:00:35.051000
889	00:00:35.091000
890	00:00:35.130000
891	00:00:35.170000
892	00:00:35.209000
893	00:00:35.249000
894	00:00:35.288000
895	00:00:35.328000
896	00:00:35.368000
897	00:00:35.407000
898	00:00:35.447000
899	00:00:35.486000
900	00:00:35.526000
901	00:00:35.565000
902	00:00:35.605000
903	00:00:35.644000
904	00:00:35.684000
905	00:00:35.723000
906	00:00:35.763000
907	00:00:35.802000
908	00:00:35.842000
909	00:00:35.881000
910	00:00:35.921000
911	00:00:35.960000
912	00:00:36
913	00:00:36.039000
914	00:00:36.079000
915	00:00:36.118000
916	00:00:36.158000
917	00:00:36.197000
918	00:00:36.237000
919	00:00:36.276000
920	00:00:36.316000
921	00:00:36.355000
922	00:00:36.395000
923	00:00:36.434000
924	00:00:36.474000
925	00:00:36.513000
926	00:00:36.553000
927	00:00:36.592000
928	00:00:36.632000
929	00:00:36.671000
930	00:00:36.711000
931	00:00:36.750000
932	00:00:36.790000
933	00:00:36.829000
934	00:00:36.869000
935	00:00:36.908000
936	00:00:36.948000
937	00:00:36.987000
938	00:00:37.027000
939	00:00:37.066000
940	00:00:37.106000
941	00:00:37.145000
942	00:00:37.185000
943	00:00:37.225000
944	00:00:37.264000
945	00:00:37.304000
946	00:00:37.343000
947	00:00:37.383000
948	00:00:37.422000
949	00:00:37.462000
950	00:00:37.501000
951	00:00:37.541000
952	00:00:37.580000
953	00:00:37.620000
954	00:00:37.659000
955	00:00:37.699000
956	00:00:37.738000
957	00:00:37.778000
958	00:00:37.817000
959	00:00:37.857000
960	00:00:37.896000
961	00:00:37.936000
962	00:00:37.975000
963	00:00:38.015000
964	00:00:38.054000
965	00:00:38.094000
966	00:00:38.133000
967	00:00:38.173000
968	00:00:38.212000
969	00:00:38.252000
970	00:00:38.291000
971	00:00:38.331000
972	00:00:38.370000
973	00:00:38.410000
974	00:00:38.449000
975	00:00:38.489000
976	00:00:38.528000
977	00:00:38.568000
978	00:00:38.607000
979	00:00:38.647000
980	00:00:38.687000
981	00:00:38.726000
982	00:00:38.766000
983	00:00:38.805000
984	00:00:38.845000
985	00:00:38.884000
986	00:00:38.924000
987	00:00:38.963000
988	00:00:39.003000
989	00:00:39.042000
990	00:00:39.082000
991	00:00:39.121000
992	00:00:39.161000
993	00:00:39.200000
994	00:00:39.240000
995	00:00:39.279000
996	00:00:39.319000
997	00:00:39.358000
998	00:00:39.398000
999	00:00:39.437000
1000	00:00:39.477000
1001	00:00:39.516000
1002	00:00:39.556000
1003	00:00:39.595000
1004	00:00:39.635000
1005	00:00:39.674000
1006	00:00:39.714000
1007	00:00:39.753000
1008	00:00:39.793000
1009	00:00:39.832000
1010	00:00:39.872000
1011	00:00:39.911000
1012	00:00:39.951000
1013	00:00:39.990000
1014	00:00:40.030000
1015	00:00:40.069000
1016	00:00:40.109000
1017	00:00:40.148000
1018	00:00:40.188000
1019	00:00:40.228000
1020	00:00:40.267000
1021	00:00:40.307000
1022	00:00:40.346000
1023	00:00:40.386000
1024	00:00:40.425000
1025	00:00:40.465000
1026	00:00:40.504000
1027	00:00:40.544000
1028	00:00:40.583000
1029	00:00:40.623000
1030	00:00:40.662000
1031	00:00:40.702000
1032	00:00:40.741000
1033	00:00:40.781000
1034	00:00:40.820000
1035	00:00:40.860000
1036	00:00:40.899000
1037	00:00:40.939000
1038	00:00:40.978000
1039	00:00:41.018000
1040	00:00:41.057000
1041	00:00:41.097000
1042	00:00:41.136000
1043	00:00:41.176000
1044	00:00:41.216000
1045	00:00:41.256000
1046	00:00:41.295000
1047	00:00:41.335000
1048	00:00:41.374000
1049	00:00:41.414000
1050	00:00:41.453000
1051	00:00:41.493000
1052	00:00:41.532000
1053	00:00:41.572000
1054	00:00:41.611000
1055	00:00:41.651000
1056	00:00:41.691000
1057	00:00:41.730000
1058	00:00:41.770000
1059	00:00:41.809000
1060	00:00:41.848000
1061	00:00:41.888000
1062	00:00:41.927000
1063	00:00:41.967000
1064	00:00:42.007000
1065	00:00:42.046000
1066	00:00:42.086000
1067	00:00:42.125000
1068	00:00:42.165000
1069	00:00:42.204000
1070	00:00:42.244000
1071	00:00:42.283000
1072	00:00:42.323000
1073	00:00:42.362000
1074	00:00:42.402000
1075	00:00:42.441000
1076	00:00:42.481000
1077	00:00:42.520000
1078	00:00:42.560000
1079	00:00:42.599000
1080	00:00:42.639000
1081	00:00:42.678000
1082	00:00:42.718000
1083	00:00:42.757000
1084	00:00:42.797000
1085	00:00:42.836000
1086	00:00:42.876000
1087	00:00:42.915000
1088	00:00:42.955000
1089	00:00:42.994000
1090	00:00:43.034000
1091	00:00:43.073000
1092	00:00:43.113000
1093	00:00:43.152000
1094	00:00:43.192000
1095	00:00:43.231000
1096	00:00:43.271000
1097	00:00:43.310000
1098	00:00:43.350000
1099	00:00:43.389000
1100	00:00:43.429000
1101	00:00:43.468000
1102	00:00:43.508000
1103	00:00:43.548000
1104	00:00:43.587000
1105	00:00:43.627000
1106	00:00:43.666000
1107	00:00:43.706000
1108	00:00:43.745000
1109	00:00:43.785000
1110	00:00:43.824000
1111	00:00:43.864000
1112	00:00:43.903000
1113	00:00:43.943000
1114	00:00:43.982000
1115	00:00:44.022000
1116	00:00:44.061000
1117	00:00:44.101000
1118	00:00:44.140000
1119	00:00:44.180000
1120	00:00:44.219000
1121	00:00:44.259000
1122	00:00:44.298000
1123	00:00:44.338000
1124	00:00:44.377000
1125	00:00:44.417000
1126	00:00:44.456000
1127	00:00:44.496000
1128	00:00:44.535000
1129	00:00:44.575000
1130	00:00:44.614000
1131	00:00:44.654000
1132	00:00:44.693000
1133	00:00:44.733000
1134	00:00:44.772000
1135	00:00:44.812000
1136	00:00:44.851000
1137	00:00:44.891000
1138	00:00:44.930000
1139	00:00:44.970000
1140	00:00:45.010000
1141	00:00:45.049000
1142	00:00:45.089000
1143	00:00:45.128000
1144	00:00:45.168000
1145	00:00:45.207000
1146	00:00:45.247000
1147	00:00:45.286000
1148	00:00:45.326000
1149	00:00:45.365000
1150	00:00:45.405000
1151	00:00:45.444000
1152	00:00:45.484000
1153	00:00:45.523000
1154	00:00:45.563000
1155	00:00:45.602000
1156	00:00:45.642000
1157	00:00:45.681000
1158	00:00:45.721000
1159	00:00:45.760000
1160	00:00:45.800000
1161	00:00:45.839000
1162	00:00:45.879000
1163	00:00:45.918000
1164	00:00:45.958000
1165	00:00:45.997000
1166	00:00:46.037000
1167	00:00:46.076000
1168	00:00:46.116000
1169	00:00:46.155000
1170	00:00:46.195000
1171	00:00:46.234000
1172	00:00:46.274000
1173	00:00:46.313000
1174	00:00:46.353000
1175	00:00:46.392000
1176	00:00:46.432000
1177	00:00:46.471000
1178	00:00:46.511000
1179	00:00:46.551000
1180	00:00:46.590000
1181	00:00:46.630000
1182	00:00:46.669000
1183	00:00:46.708000
1184	00:00:46.748000
1185	00:00:46.787000
1186	00:00:46.827000
1187	00:00:46.867000
1188	00:00:46.906000
1189	00:00:46.946000
1190	00:00:46.985000
1191	00:00:47.025000
1192	00:00:47.064000
1193	00:00:47.104000
1194	00:00:47.143000
1195	00:00:47.183000
1196	00:00:47.222000
1197	00:00:47.262000
1198	00:00:47.301000
1199	00:00:47.341000
1200	00:00:47.380000
1201	00:00:47.420000
1202	00:00:47.459000
1203	00:00:47.499000
1204	00:00:47.538000
1205	00:00:47.578000
1206	00:00:47.617000
1207	00:00:47.657000
1208	00:00:47.696000
1209	00:00:47.736000
1210	00:00:47.775000
1211	00:00:47.815000
1212	00:00:47.854000
1213	00:00:47.894000
1214	00:00:47.933000
1215	00:00:47.973000
1216	00:00:48.012000
1217	00:00:48.052000
1218	00:00:48.091000
1219	00:00:48.131000
1220	00:00:48.170000
1221	00:00:48.210000
1222	00:00:48.249000
1223	00:00:48.289000
1224	00:00:48.329000
1225	00:00:48.368000
1226	00:00:48.408000
1227	00:00:48.447000
1228	00:00:48.487000
1229	00:00:48.526000
1230	00:00:48.566000
1231	00:00:48.605000
1232	00:00:48.645000
1233	00:00:48.684000
1234	00:00:48.724000
1235	00:00:48.763000
1236	00:00:48.803000
1237	00:00:48.842000
1238	00:00:48.882000
1239	00:00:48.921000
1240	00:00:48.961000
1241	00:00:49
1242	00:00:49.040000
1243	00:00:49.079000
1244	00:00:49.119000
1245	00:00:49.158000
1246	00:00:49.198000
1247	00:00:49.237000
1248	00:00:49.277000
1249	00:00:49.316000
1250	00:00:49.356000
1251	00:00:49.395000
1252	00:00:49.435000
1253	00:00:49.474000
1254	00:00:49.514000
1255	00:00:49.553000
1256	00:00:49.593000
1257	00:00:49.632000
1258	00:00:49.672000
1259	00:00:49.711000
1260	00:00:49.751000
1261	00:00:49.790000
1262	00:00:49.830000
1263	00:00:49.870000
1264	00:00:49.909000
1265	00:00:49.949000
1266	00:00:49.988000
1267	00:00:50.028000
1268	00:00:50.067000
1269	00:00:50.107000
1270	00:00:50.146000
1271	00:00:50.186000
1272	00:00:50.225000
1273	00:00:50.265000
1274	00:00:50.304000
1275	00:00:50.344000
1276	00:00:50.383000
1277	00:00:50.423000
1278	00:00:50.462000
1279	00:00:50.502000
1280	00:00:50.541000
1281	00:00:50.581000
1282	00:00:50.620000
1283	00:00:50.660000
1284	00:00:50.699000
1285	00:00:50.739000
1286	00:00:50.778000
1287	00:00:50.818000
1288	00:00:50.857000
1289	00:00:50.897000
1290	00:00:50.936000
1291	00:00:50.976000
1292	00:00:51.015000
1293	00:00:51.055000
1294	00:00:51.094000
1295	00:00:51.134000
1296	00:00:51.173000
1297	00:00:51.214000
1298	00:00:51.253000
1299	00:00:51.293000
1300	00:00:51.333000
1301	00:00:51.372000
1302	00:00:51.412000
1303	00:00:51.451000
1304	00:00:51.490000
1305	00:00:51.530000
1306	00:00:51.569000
1307	00:00:51.609000
1308	00:00:51.649000
1309	00:00:51.688000
1310	00:00:51.728000
1311	00:00:51.767000
1312	00:00:51.807000
1313	00:00:51.846000
1314	00:00:51.886000
1315	00:00:51.925000
1316	00:00:51.965000
1317	00:00:52.004000
1318	00:00:52.044000
1319	00:00:52.083000
1320	00:00:52.123000
1321	00:00:52.162000
1322	00:00:52.202000
1323	00:00:52.241000
1324	00:00:52.281000
1325	00:00:52.320000
1326	00:00:52.360000
1327	00:00:52.399000
1328	00:00:52.439000
1329	00:00:52.478000
1330	00:00:52.518000
1331	00:00:52.557000
1332	00:00:52.597000
1333	00:00:52.636000
1334	00:00:52.676000
1335	00:00:52.715000
1336	00:00:52.755000
1337	00:00:52.794000
1338	00:00:52.834000
1339	00:00:52.873000
1340	00:00:52.913000
1341	00:00:52.952000
1342	00:00:52.992000
1343	00:00:53.031000
1344	00:00:53.071000
1345	00:00:53.110000
1346	00:00:53.150000
1347	00:00:53.190000
1348	00:00:53.229000
1349	00:00:53.269000
1350	00:00:53.308000
1351	00:00:53.348000
1352	00:00:53.387000
1353	00:00:53.427000
1354	00:00:53.466000
1355	00:00:53.506000
1356	00:00:53.545000
1357	00:00:53.585000
1358	00:00:53.624000
1359	00:00:53.664000
1360	00:00:53.703000
1361	00:00:53.743000
1362	00:00:53.782000
1363	00:00:53.822000
1364	00:00:53.861000
1365	00:00:53.901000
1366	00:00:53.940000
1367	00:00:53.980000
1368	00:00:54.019000
1369	00:00:54.059000
1370	00:00:54.098000
1371	00:00:54.138000
1372	00:00:54.177000
1373	00:00:54.217000
1374	00:00:54.256000
1375	00:00:54.296000
1376	00:00:54.335000
1377	00:00:54.375000
1378	00:00:54.414000
1379	00:00:54.454000
1380	00:00:54.493000
1381	00:00:54.533000
1382	00:00:54.572000
1383	00:00:54.612000
1384	00:00:54.652000
1385	00:00:54.691000
1386	00:00:54.731000
1387	00:00:54.770000
1388	00:00:54.810000
1389	00:00:54.849000
1390	00:00:54.889000
1391	00:00:54.928000
1392	00:00:54.968000
1393	00:00:55.007000
1394	00:00:55.047000
1395	00:00:55.086000
1396	00:00:55.126000
1397	00:00:55.165000
1398	00:00:55.205000
1399	00:00:55.244000
1400	00:00:55.284000
1401	00:00:55.323000
1402	00:00:55.363000
1403	00:00:55.402000
1404	00:00:55.442000
1405	00:00:55.481000
1406	00:00:55.521000
1407	00:00:55.560000
1408	00:00:55.600000
1409	00:00:55.639000
1410	00:00:55.679000
1411	00:00:55.718000
1412	00:00:55.758000
1413	00:00:55.797000
1414	00:00:55.837000
1415	00:00:55.876000
1416	00:00:55.916000
1417	00:00:55.955000
1418	00:00:55.995000
1419	00:00:56.034000
1420	00:00:56.074000
1421	00:00:56.113000
1422	00:00:56.153000
1423	00:00:56.193000
1424	00:00:56.232000
1425	00:00:56.271000
1426	00:00:56.311000
1427	00:00:56.350000
1428	00:00:56.390000
1429	00:00:56.429000
1430	00:00:56.469000
1431	00:00:56.509000
1432	00:00:56.548000
1433	00:00:56.588000
1434	00:00:56.627000
1435	00:00:56.667000
1436	00:00:56.706000
1437	00:00:56.746000
1438	00:00:56.785000
1439	00:00:56.825000
1440	00:00:56.864000
1441	00:00:56.904000
1442	00:00:56.943000
1443	00:00:56.983000
1444	00:00:57.022000
1445	00:00:57.062000
1446	00:00:57.101000
1447	00:00:57.141000
1448	00:00:57.180000
1449	00:00:57.220000
1450	00:00:57.259000
1451	00:00:57.299000
1452	00:00:57.338000
1453	00:00:57.378000
1454	00:00:57.417000
1455	00:00:57.457000
1456	00:00:57.496000
1457	00:00:57.536000
1458	00:00:57.575000
1459	00:00:57.615000
1460	00:00:57.654000
1461	00:00:57.694000
1462	00:00:57.733000
1463	00:00:57.773000
1464	00:00:57.812000
1465	00:00:57.852000
1466	00:00:57.891000
1467	00:00:57.931000
1468	00:00:57.971000
1469	00:00:58.010000
1470	00:00:58.050000
1471	00:00:58.089000
1472	00:00:58.129000
1473	00:00:58.168000
1474	00:00:58.208000
1475	00:00:58.247000
1476	00:00:58.287000
1477	00:00:58.326000
1478	00:00:58.366000
1479	00:00:58.405000
1480	00:00:58.445000
1481	00:00:58.484000
1482	00:00:58.524000
1483	00:00:58.563000
1484	00:00:58.603000
1485	00:00:58.642000
1486	00:00:58.682000
1487	00:00:58.721000
1488	00:00:58.761000
1489	00:00:58.800000
1490	00:00:58.840000
1491	00:00:58.879000
1492	00:00:58.919000
1493	00:00:58.958000
1494	00:00:58.998000
1495	00:00:59.037000
1496	00:00:59.077000
1497	00:00:59.116000
1498	00:00:59.156000
1499	00:00:59.195000
1500	00:00:59.235000
1501	00:00:59.274000
1502	00:00:59.314000
1503	00:00:59.353000
1504	00:00:59.393000
1505	00:00:59.432000
1506	00:00:59.472000
1507	00:00:59.512000
1508	00:00:59.551000
1509	00:00:59.591000
1510	00:00:59.630000
1511	00:00:59.670000
1512	00:00:59.709000
1513	00:00:59.749000
1514	00:00:59.788000
1515	00:00:59.828000
1516	00:00:59.867000
1517	00:00:59.907000

## Sheet: #5
frame	time	PC	TB	ant isth	mid isth	post isth
100	00:00:03.912000
101	00:00:03.951000
102	00:00:03.991000
103	00:00:04.030000
104	00:00:04.070000
105	00:00:04.109000
106	00:00:04.149000
107	00:00:04.188000
108	00:00:04.228000
109	00:00:04.267000
110	00:00:04.307000
111	00:00:04.346000
112	00:00:04.386000
113	00:00:04.425000
114	00:00:04.465000
115	00:00:04.504000
116	00:00:04.544000
117	00:00:04.583000
118	00:00:04.623000
119	00:00:04.662000
120	00:00:04.702000
121	00:00:04.741000
122	00:00:04.781000
123	00:00:04.820000
124	00:00:04.860000
125	00:00:04.899000
126	00:00:04.939000
127	00:00:04.979000
128	00:00:05.018000
129	00:00:05.058000
130	00:00:05.097000
131	00:00:05.137000
132	00:00:05.176000
133	00:00:05.215000
134	00:00:05.255000
135	00:00:05.295000
136	00:00:05.334000
137	00:00:05.375000
138	00:00:05.414000
139	00:00:05.454000
140	00:00:05.493000
141	00:00:05.533000
142	00:00:05.572000
143	00:00:05.612000
144	00:00:05.651000
145	00:00:05.691000
146	00:00:05.730000
147	00:00:05.770000
148	00:00:05.809000
149	00:00:05.849000
150	00:00:05.888000
151	00:00:05.928000
152	00:00:05.967000
153	00:00:06.007000
154	00:00:06.046000
155	00:00:06.086000
156	00:00:06.125000
157	00:00:06.165000
158	00:00:06.204000
159	00:00:06.244000
160	00:00:06.283000
161	00:00:06.323000
162	00:00:06.362000
163	00:00:06.402000
164	00:00:06.441000
165	00:00:06.481000
166	00:00:06.520000
167	00:00:06.560000
168	00:00:06.599000
169	00:00:06.639000
170	00:00:06.678000
171	00:00:06.718000
172	00:00:06.757000
173	00:00:06.797000
174	00:00:06.837000
175	00:00:06.876000
176	00:00:06.916000
177	00:00:06.955000
178	00:00:06.995000
179	00:00:07.034000
180	00:00:07.074000
181	00:00:07.113000
182	00:00:07.153000
183	00:00:07.192000
184	00:00:07.232000
185	00:00:07.271000
186	00:00:07.311000
187	00:00:07.350000
188	00:00:07.390000
189	00:00:07.429000
190	00:00:07.469000
191	00:00:07.508000
192	00:00:07.548000
193	00:00:07.587000
194	00:00:07.627000
195	00:00:07.666000
196	00:00:07.706000
197	00:00:07.745000
198	00:00:07.785000
199	00:00:07.824000
200	00:00:07.864000
201	00:00:07.903000
202	00:00:07.943000
203	00:00:07.982000
204	00:00:08.022000
205	00:00:08.061000
206	00:00:08.101000
207	00:00:08.140000
208	00:00:08.180000
209	00:00:08.219000
210	00:00:08.259000
211	00:00:08.299000
212	00:00:08.338000
213	00:00:08.378000
214	00:00:08.417000
215	00:00:08.457000
216	00:00:08.496000
217	00:00:08.536000
218	00:00:08.575000
219	00:00:08.615000
220	00:00:08.654000
221	00:00:08.694000
222	00:00:08.733000
223	00:00:08.773000
224	00:00:08.812000
225	00:00:08.852000
226	00:00:08.891000
227	00:00:08.931000
228	00:00:08.970000
229	00:00:09.010000
230	00:00:09.049000
231	00:00:09.089000
232	00:00:09.128000
233	00:00:09.168000
234	00:00:09.207000
235	00:00:09.247000
236	00:00:09.286000
237	00:00:09.326000
238	00:00:09.365000
239	00:00:09.405000
240	00:00:09.444000
241	00:00:09.484000
242	00:00:09.523000
243	00:00:09.563000
244	00:00:09.602000
245	00:00:09.642000
246	00:00:09.681000
247	00:00:09.721000
248	00:00:09.760000
249	00:00:09.800000
250	00:00:09.840000
251	00:00:09.879000
252	00:00:09.919000
253	00:00:09.958000
254	00:00:09.998000
255	00:00:10.037000
256	00:00:10.077000
257	00:00:10.116000
258	00:00:10.156000
259	00:00:10.195000
260	00:00:10.235000
261	00:00:10.274000
262	00:00:10.314000
263	00:00:10.353000
264	00:00:10.393000
265	00:00:10.432000
266	00:00:10.472000
267	00:00:10.511000
268	00:00:10.551000
269	00:00:10.590000
270	00:00:10.630000
271	00:00:10.669000
272	00:00:10.709000
273	00:00:10.748000
274	00:00:10.788000
275	00:00:10.827000
276	00:00:10.867000
277	00:00:10.906000
278	00:00:10.946000
279	00:00:10.985000
280	00:00:11.025000
281	00:00:11.064000
282	00:00:11.104000
283	00:00:11.143000
284	00:00:11.183000
285	00:00:11.222000
286	00:00:11.262000
287	00:00:11.301000
288	00:00:11.341000
289	00:00:11.380000
290	00:00:11.420000
291	00:00:11.459000
292	00:00:11.499000
293	00:00:11.538000
294	00:00:11.578000
295	00:00:11.618000
296	00:00:11.657000
297	00:00:11.697000
298	00:00:11.736000
299	00:00:11.776000
300	00:00:11.815000
301	00:00:11.855000
302	00:00:11.894000
303	00:00:11.934000
304	00:00:11.973000
305	00:00:12.013000
306	00:00:12.052000
307	00:00:12.092000
308	00:00:12.131000
309	00:00:12.171000
310	00:00:12.210000
311	00:00:12.250000
312	00:00:12.289000
313	00:00:12.329000
314	00:00:12.368000
315	00:00:12.408000
316	00:00:12.447000
317	00:00:12.487000
318	00:00:12.526000
319	00:00:12.566000
320	00:00:12.605000
321	00:00:12.645000
322	00:00:12.684000
323	00:00:12.724000
324	00:00:12.763000
325	00:00:12.803000
326	00:00:12.842000
327	00:00:12.882000
328	00:00:12.921000
329	00:00:12.961000
330	00:00:13
331	00:00:13.040000
332	00:00:13.079000
333	00:00:13.119000
334	00:00:13.159000
335	00:00:13.198000
336	00:00:13.238000
337	00:00:13.277000
338	00:00:13.317000
339	00:00:13.356000
340	00:00:13.396000
341	00:00:13.435000
342	00:00:13.475000
343	00:00:13.514000
344	00:00:13.554000
345	00:00:13.593000
346	00:00:13.633000
347	00:00:13.672000
348	00:00:13.712000
349	00:00:13.751000
350	00:00:13.791000
351	00:00:13.830000
352	00:00:13.870000
353	00:00:13.909000
354	00:00:13.949000
355	00:00:13.988000
356	00:00:14.028000
357	00:00:14.067000
358	00:00:14.107000
359	00:00:14.146000
360	00:00:14.186000
361	00:00:14.225000
362	00:00:14.265000
363	00:00:14.304000
364	00:00:14.344000
365	00:00:14.383000
366	00:00:14.423000
367	00:00:14.462000
368	00:00:14.502000
369	00:00:14.541000
370	00:00:14.581000
371	00:00:14.621000
372	00:00:14.660000
373	00:00:14.700000
374	00:00:14.739000
375	00:00:14.779000
376	00:00:14.818000
377	00:00:14.858000
378	00:00:14.897000
379	00:00:14.937000
380	00:00:14.976000
381	00:00:15.016000
382	00:00:15.055000
383	00:00:15.095000
384	00:00:15.134000
385	00:00:15.174000
386	00:00:15.213000
387	00:00:15.253000
388	00:00:15.292000
389	00:00:15.332000
390	00:00:15.372000
391	00:00:15.412000
392	00:00:15.451000
393	00:00:15.491000
394	00:00:15.530000
395	00:00:15.570000
396	00:00:15.609000
397	00:00:15.649000
398	00:00:15.688000
399	00:00:15.728000
400	00:00:15.767000
401	00:00:15.807000
402	00:00:15.846000
403	00:00:15.886000
404	00:00:15.925000
405	00:00:15.965000
406	00:00:16.004000
407	00:00:16.044000
408	00:00:16.083000
409	00:00:16.123000
410	00:00:16.163000
411	00:00:16.202000
412	00:00:16.241000
413	00:00:16.281000
414	00:00:16.321000
415	00:00:16.360000
416	00:00:16.399000
417	00:00:16.439000
418	00:00:16.479000
419	00:00:16.518000
420	00:00:16.558000
421	00:00:16.597000
422	00:00:16.637000
423	00:00:16.676000
424	00:00:16.716000
425	00:00:16.755000
426	00:00:16.795000
427	00:00:16.834000
428	00:00:16.874000
429	00:00:16.913000
430	00:00:16.953000
431	00:00:16.992000
432	00:00:17.032000
433	00:00:17.071000
434	00:00:17.111000
435	00:00:17.150000
436	00:00:17.190000
437	00:00:17.229000
438	00:00:17.269000
439	00:00:17.308000
440	00:00:17.348000
441	00:00:17.387000
442	00:00:17.427000
443	00:00:17.466000
444	00:00:17.506000
445	00:00:17.545000
446	00:00:17.585000
447	00:00:17.624000
448	00:00:17.664000
449	00:00:17.703000
450	00:00:17.743000
451	00:00:17.782000
452	00:00:17.822000
453	00:00:17.861000
454	00:00:17.901000
455	00:00:17.941000
456	00:00:17.980000
457	00:00:18.020000
458	00:00:18.059000
459	00:00:18.099000
460	00:00:18.138000
461	00:00:18.178000
462	00:00:18.217000
463	00:00:18.257000
464	00:00:18.296000
465	00:00:18.336000
466	00:00:18.375000
467	00:00:18.415000
468	00:00:18.454000
469	00:00:18.494000
470	00:00:18.533000
471	00:00:18.573000
472	00:00:18.612000
473	00:00:18.652000
474	00:00:18.691000
475	00:00:18.731000
476	00:00:18.770000
477	00:00:18.810000
478	00:00:18.849000
479	00:00:18.889000
480	00:00:18.928000
481	00:00:18.968000
482	00:00:19.007000
483	00:00:19.047000
484	00:00:19.086000
485	00:00:19.126000
486	00:00:19.165000
487	00:00:19.205000
488	00:00:19.244000
489	00:00:19.284000
490	00:00:19.323000
491	00:00:19.363000
492	00:00:19.402000
493	00:00:19.442000
494	00:00:19.482000
495	00:00:19.521000
496	00:00:19.561000
497	00:00:19.600000
498	00:00:19.640000
499	00:00:19.679000
500	00:00:19.718000
501	00:00:19.758000
502	00:00:19.798000
503	00:00:19.837000
504	00:00:19.877000
505	00:00:19.916000
506	00:00:19.956000
507	00:00:19.995000
508	00:00:20.035000
509	00:00:20.074000
510	00:00:20.114000
511	00:00:20.153000
512	00:00:20.193000
513	00:00:20.232000
514	00:00:20.272000
515	00:00:20.311000
516	00:00:20.351000
517	00:00:20.390000
518	00:00:20.430000
519	00:00:20.469000
520	00:00:20.509000
521	00:00:20.548000
522	00:00:20.588000
523	00:00:20.627000
524	00:00:20.667000
525	00:00:20.706000
526	00:00:20.746000
527	00:00:20.785000
528	00:00:20.825000
529	00:00:20.864000
530	00:00:20.904000
531	00:00:20.943000
532	00:00:20.983000
533	00:00:21.022000
534	00:00:21.062000
535	00:00:21.101000
536	00:00:21.141000
537	00:00:21.180000
538	00:00:21.220000
539	00:00:21.260000
540	00:00:21.299000
541	00:00:21.339000
542	00:00:21.378000
543	00:00:21.418000
544	00:00:21.457000
545	00:00:21.497000
546	00:00:21.536000
547	00:00:21.576000
548	00:00:21.615000
549	00:00:21.655000
550	00:00:21.694000
551	00:00:21.734000
552	00:00:21.773000
553	00:00:21.813000
554	00:00:21.852000
555	00:00:21.892000
556	00:00:21.931000
557	00:00:21.971000
558	00:00:22.010000
559	00:00:22.050000
560	00:00:22.089000
561	00:00:22.129000
562	00:00:22.168000
563	00:00:22.208000
564	00:00:22.247000
565	00:00:22.287000
566	00:00:22.326000
567	00:00:22.366000
568	00:00:22.405000
569	00:00:22.445000
570	00:00:22.484000
571	00:00:22.524000
572	00:00:22.563000
573	00:00:22.603000
574	00:00:22.642000
575	00:00:22.682000
576	00:00:22.721000
577	00:00:22.761000
578	00:00:22.801000
579	00:00:22.840000
580	00:00:22.880000
581	00:00:22.919000
582	00:00:22.959000
583	00:00:22.998000
584	00:00:23.038000
585	00:00:23.077000
586	00:00:23.117000
587	00:00:23.156000
588	00:00:23.196000
589	00:00:23.235000
590	00:00:23.275000
591	00:00:23.314000
592	00:00:23.354000
593	00:00:23.393000
594	00:00:23.433000
595	00:00:23.472000
596	00:00:23.512000
597	00:00:23.551000
598	00:00:23.591000
599	00:00:23.630000
600	00:00:23.670000
601	00:00:23.709000
602	00:00:23.749000
603	00:00:23.788000
604	00:00:23.828000
605	00:00:23.867000
606	00:00:23.907000
607	00:00:23.946000
608	00:00:23.986000
609	00:00:24.025000
610	00:00:24.065000
611	00:00:24.104000
612	00:00:24.144000
613	00:00:24.183000
614	00:00:24.223000
615	00:00:24.262000
616	00:00:24.302000
617	00:00:24.342000
618	00:00:24.381000
619	00:00:24.421000
620	00:00:24.460000
621	00:00:24.500000
622	00:00:24.539000
623	00:00:24.579000
624	00:00:24.618000
625	00:00:24.658000
626	00:00:24.697000
627	00:00:24.737000
628	00:00:24.776000
629	00:00:24.816000
630	00:00:24.855000
631	00:00:24.895000
632	00:00:24.934000
633	00:00:24.974000
634	00:00:25.013000
635	00:00:25.053000
636	00:00:25.092000
637	00:00:25.132000
638	00:00:25.171000
639	00:00:25.211000
640	00:00:25.250000
641	00:00:25.290000
642	00:00:25.329000
643	00:00:25.370000
644	00:00:25.409000
645	00:00:25.449000
646	00:00:25.488000
647	00:00:25.528000
648	00:00:25.567000
649	00:00:25.607000
650	00:00:25.646000
651	00:00:25.686000
652	00:00:25.725000
653	00:00:25.765000
654	00:00:25.804000
655	00:00:25.844000
656	00:00:25.884000
657	00:00:25.923000
658	00:00:25.962000
659	00:00:26.002000
660	00:00:26.041000
661	00:00:26.081000
662	00:00:26.121000
663	00:00:26.160000
664	00:00:26.200000
665	00:00:26.239000
666	00:00:26.279000
667	00:00:26.318000
668	00:00:26.358000
669	00:00:26.397000
670	00:00:26.437000
671	00:00:26.476000
672	00:00:26.516000
673	00:00:26.555000
674	00:00:26.595000
675	00:00:26.634000
676	00:00:26.674000
677	00:00:26.713000
678	00:00:26.753000
679	00:00:26.792000
680	00:00:26.832000
681	00:00:26.871000
682	00:00:26.911000
683	00:00:26.950000
684	00:00:26.990000
685	00:00:27.029000
686	00:00:27.069000
687	00:00:27.108000
688	00:00:27.148000
689	00:00:27.187000
690	00:00:27.227000
691	00:00:27.266000
692	00:00:27.306000
693	00:00:27.345000
694	00:00:27.385000
695	00:00:27.424000
696	00:00:27.464000
697	00:00:27.503000
698	00:00:27.543000
699	00:00:27.582000
700	00:00:27.622000
701	00:00:27.662000
702	00:00:27.701000
703	00:00:27.741000
704	00:00:27.780000
705	00:00:27.820000
706	00:00:27.859000
707	00:00:27.899000
708	00:00:27.938000
709	00:00:27.978000
710	00:00:28.017000
711	00:00:28.057000
712	00:00:28.096000
713	00:00:28.136000
714	00:00:28.175000
715	00:00:28.215000
716	00:00:28.254000
717	00:00:28.294000
718	00:00:28.333000
719	00:00:28.373000
720	00:00:28.412000
721	00:00:28.452000
722	00:00:28.491000
723	00:00:28.531000
724	00:00:28.570000
725	00:00:28.610000
726	00:00:28.649000
727	00:00:28.689000
728	00:00:28.728000
729	00:00:28.768000
730	00:00:28.807000
731	00:00:28.847000
732	00:00:28.886000
733	00:00:28.926000
734	00:00:28.965000
735	00:00:29.005000
736	00:00:29.044000
737	00:00:29.084000
738	00:00:29.124000
739	00:00:29.163000
740	00:00:29.203000
741	00:00:29.242000
742	00:00:29.282000
743	00:00:29.321000
744	00:00:29.361000
745	00:00:29.400000
746	00:00:29.440000
747	00:00:29.479000
748	00:00:29.519000
749	00:00:29.558000
750	00:00:29.598000
751	00:00:29.637000
752	00:00:29.677000
753	00:00:29.716000
754	00:00:29.756000
755	00:00:29.795000
756	00:00:29.835000
757	00:00:29.874000
758	00:00:29.914000
759	00:00:29.953000
760	00:00:29.993000
761	00:00:30.032000
762	00:00:30.072000
763	00:00:30.111000
764	00:00:30.151000
765	00:00:30.190000
766	00:00:30.230000
767	00:00:30.269000
768	00:00:30.309000
769	00:00:30.348000
770	00:00:30.388000
771	00:00:30.427000
772	00:00:30.467000
773	00:00:30.506000
774	00:00:30.546000
775	00:00:30.585000
776	00:00:30.625000
777	00:00:30.665000
778	00:00:30.704000
779	00:00:30.743000
780	00:00:30.783000
781	00:00:30.822000
782	00:00:30.862000
783	00:00:30.901000
784	00:00:30.941000
785	00:00:30.981000
786	00:00:31.020000
787	00:00:31.060000
788	00:00:31.099000
789	00:00:31.139000
790	00:00:31.178000
791	00:00:31.218000
792	00:00:31.257000
793	00:00:31.297000
794	00:00:31.336000
795	00:00:31.376000
796	00:00:31.415000
797	00:00:31.455000
798	00:00:31.494000
799	00:00:31.534000
800	00:00:31.573000
801	00:00:31.613000
802	00:00:31.652000
803	00:00:31.692000
804	00:00:31.731000
805	00:00:31.771000
806	00:00:31.810000
807	00:00:31.850000
808	00:00:31.889000
809	00:00:31.929000
810	00:00:31.968000
811	00:00:32.008000
812	00:00:32.047000
813	00:00:32.087000
814	00:00:32.126000
815	00:00:32.166000
816	00:00:32.205000
817	00:00:32.245000
818	00:00:32.284000
819	00:00:32.324000
820	00:00:32.363000
821	00:00:32.403000
822	00:00:32.443000
823	00:00:32.482000
824	00:00:32.522000
825	00:00:32.561000
826	00:00:32.601000
827	00:00:32.640000
828	00:00:32.680000
829	00:00:32.719000
830	00:00:32.759000
831	00:00:32.798000
832	00:00:32.838000
833	00:00:32.877000
834	00:00:32.917000
835	00:00:32.956000
836	00:00:32.996000
837	00:00:33.035000
838	00:00:33.075000
839	00:00:33.114000
840	00:00:33.154000
841	00:00:33.193000
842	00:00:33.233000
843	00:00:33.272000
844	00:00:33.312000
845	00:00:33.351000
846	00:00:33.391000
847	00:00:33.430000
848	00:00:33.470000
849	00:00:33.509000
850	00:00:33.549000
851	00:00:33.588000
852	00:00:33.628000
853	00:00:33.667000
854	00:00:33.707000
855	00:00:33.746000
856	00:00:33.786000
857	00:00:33.825000
858	00:00:33.865000
859	00:00:33.904000
860	00:00:33.944000
861	00:00:33.984000
862	00:00:34.023000
863	00:00:34.063000
864	00:00:34.102000
865	00:00:34.142000
866	00:00:34.181000
867	00:00:34.221000
868	00:00:34.260000
869	00:00:34.300000
870	00:00:34.339000
871	00:00:34.379000
872	00:00:34.418000
873	00:00:34.458000
874	00:00:34.497000
875	00:00:34.537000
876	00:00:34.576000
877	00:00:34.616000
878	00:00:34.655000
879	00:00:34.695000
880	00:00:34.734000
881	00:00:34.774000
882	00:00:34.813000
883	00:00:34.853000
884	00:00:34.892000
885	00:00:34.932000
886	00:00:34.971000
887	00:00:35.011000
888	00:00:35.050000
889	00:00:35.090000
890	00:00:35.129000
891	00:00:35.169000
892	00:00:35.208000
893	00:00:35.248000
894	00:00:35.287000
895	00:00:35.327000
896	00:00:35.367000
897	00:00:35.407000
898	00:00:35.447000
899	00:00:35.486000
900	00:00:35.525000
901	00:00:35.565000
902	00:00:35.604000
903	00:00:35.644000
904	00:00:35.683000
905	00:00:35.723000
906	00:00:35.763000
907	00:00:35.802000
908	00:00:35.842000
909	00:00:35.881000
910	00:00:35.921000
911	00:00:35.960000
912	00:00:36
913	00:00:36.039000
914	00:00:36.079000
915	00:00:36.118000
916	00:00:36.158000
917	00:00:36.197000
918	00:00:36.237000
919	00:00:36.276000
920	00:00:36.316000
921	00:00:36.355000
922	00:00:36.395000
923	00:00:36.434000
924	00:00:36.474000
925	00:00:36.513000
926	00:00:36.553000
927	00:00:36.592000
928	00:00:36.632000
929	00:00:36.671000
930	00:00:36.711000
931	00:00:36.750000
932	00:00:36.790000
933	00:00:36.829000
934	00:00:36.869000
935	00:00:36.908000
936	00:00:36.948000
937	00:00:36.987000
938	00:00:37.027000
939	00:00:37.066000
940	00:00:37.106000
941	00:00:37.145000
942	00:00:37.185000
943	00:00:37.224000
944	00:00:37.264000
945	00:00:37.304000
946	00:00:37.343000
947	00:00:37.383000
948	00:00:37.422000
949	00:00:37.462000
950	00:00:37.501000
951	00:00:37.541000
952	00:00:37.580000
953	00:00:37.620000
954	00:00:37.659000
955	00:00:37.699000
956	00:00:37.738000
957	00:00:37.778000
958	00:00:37.817000
959	00:00:37.857000
960	00:00:37.896000
961	00:00:37.936000
962	00:00:37.975000
963	00:00:38.015000
964	00:00:38.054000
965	00:00:38.094000
966	00:00:38.133000
967	00:00:38.173000
968	00:00:38.212000
969	00:00:38.252000
970	00:00:38.291000
971	00:00:38.331000
972	00:00:38.370000
973	00:00:38.410000
974	00:00:38.449000
975	00:00:38.489000
976	00:00:38.528000
977	00:00:38.568000
978	00:00:38.607000
979	00:00:38.647000
980	00:00:38.686000
981	00:00:38.726000
982	00:00:38.766000
983	00:00:38.805000
984	00:00:38.845000
985	00:00:38.884000
986	00:00:38.924000
987	00:00:38.963000
988	00:00:39.003000
989	00:00:39.042000
990	00:00:39.082000
991	00:00:39.121000
992	00:00:39.161000
993	00:00:39.200000
994	00:00:39.240000
995	00:00:39.279000
996	00:00:39.319000
997	00:00:39.358000
998	00:00:39.398000
999	00:00:39.437000
1000	00:00:39.477000
1001	00:00:39.516000
1002	00:00:39.556000
1003	00:00:39.595000
1004	00:00:39.635000
1005	00:00:39.674000
1006	00:00:39.714000
1007	00:00:39.753000
1008	00:00:39.793000
1009	00:00:39.832000
1010	00:00:39.872000
1011	00:00:39.911000
1012	00:00:39.951000
1013	00:00:39.990000
1014	00:00:40.030000
1015	00:00:40.069000
1016	00:00:40.109000
1017	00:00:40.148000
1018	00:00:40.188000
1019	00:00:40.227000
1020	00:00:40.267000
1021	00:00:40.306000
1022	00:00:40.346000
1023	00:00:40.385000
1024	00:00:40.425000
1025	00:00:40.464000
1026	00:00:40.504000
1027	00:00:40.543000
1028	00:00:40.583000
1029	00:00:40.623000
1030	00:00:40.662000
1031	00:00:40.702000
1032	00:00:40.741000
1033	00:00:40.781000
1034	00:00:40.820000
1035	00:00:40.860000
1036	00:00:40.899000
1037	00:00:40.939000
1038	00:00:40.978000
1039	00:00:41.018000
1040	00:00:41.057000
1041	00:00:41.097000
1042	00:00:41.136000
1043	00:00:41.176000
1044	00:00:41.215000
1045	00:00:41.255000
1046	00:00:41.294000
1047	00:00:41.334000
1048	00:00:41.373000
1049	00:00:41.413000
1050	00:00:41.452000
1051	00:00:41.492000
1052	00:00:41.531000
1053	00:00:41.571000
1054	00:00:41.610000
1055	00:00:41.650000
1056	00:00:41.689000
1057	00:00:41.729000
1058	00:00:41.768000
1059	00:00:41.808000
1060	00:00:41.847000
1061	00:00:41.887000
1062	00:00:41.926000
1063	00:00:41.966000
1064	00:00:42.005000
1065	00:00:42.045000
1066	00:00:42.085000
1067	00:00:42.124000
1068	00:00:42.164000
1069	00:00:42.203000
1070	00:00:42.243000
1071	00:00:42.282000
1072	00:00:42.322000
1073	00:00:42.361000
1074	00:00:42.401000
1075	00:00:42.440000
1076	00:00:42.480000
1077	00:00:42.519000
1078	00:00:42.559000
1079	00:00:42.598000
1080	00:00:42.638000
1081	00:00:42.677000
1082	00:00:42.717000
1083	00:00:42.756000
1084	00:00:42.796000
1085	00:00:42.835000
1086	00:00:42.875000
1087	00:00:42.914000
1088	00:00:42.954000
1089	00:00:42.993000
1090	00:00:43.033000
1091	00:00:43.072000
1092	00:00:43.112000
1093	00:00:43.151000
1094	00:00:43.191000
1095	00:00:43.230000
1096	00:00:43.270000
1097	00:00:43.309000
1098	00:00:43.349000
1099	00:00:43.388000
1100	00:00:43.428000
1101	00:00:43.467000
1102	00:00:43.507000
1103	00:00:43.546000
1104	00:00:43.586000
1105	00:00:43.626000
1106	00:00:43.665000
1107	00:00:43.705000
1108	00:00:43.744000
1109	00:00:43.784000
1110	00:00:43.823000
1111	00:00:43.863000
1112	00:00:43.902000
1113	00:00:43.942000
1114	00:00:43.981000
1115	00:00:44.021000
1116	00:00:44.060000
1117	00:00:44.100000
1118	00:00:44.139000
1119	00:00:44.179000
1120	00:00:44.218000

## Sheet: #7
frame	time	PC	TB	ant isth	mid isth	post isth
300	00:00:11.815000
301	00:00:11.855000
302	00:00:11.894000
303	00:00:11.934000
304	00:00:11.973000
305	00:00:12.012000
306	00:00:12.052000
307	00:00:12.092000
308	00:00:12.131000
309	00:00:12.171000
310	00:00:12.210000
311	00:00:12.250000
312	00:00:12.289000
313	00:00:12.329000
314	00:00:12.368000
315	00:00:12.408000
316	00:00:12.447000
317	00:00:12.487000
318	00:00:12.526000
319	00:00:12.566000
320	00:00:12.605000
321	00:00:12.645000
322	00:00:12.684000
323	00:00:12.724000
324	00:00:12.763000
325	00:00:12.803000
326	00:00:12.842000
327	00:00:12.882000
328	00:00:12.921000
329	00:00:12.961000
330	00:00:13
331	00:00:13.040000
332	00:00:13.079000
333	00:00:13.119000
334	00:00:13.158000
335	00:00:13.198000
336	00:00:13.237000
337	00:00:13.277000
338	00:00:13.316000
339	00:00:13.356000
340	00:00:13.395000
341	00:00:13.435000
342	00:00:13.474000
343	00:00:13.514000
344	00:00:13.553000
345	00:00:13.593000
346	00:00:13.633000
347	00:00:13.672000
348	00:00:13.712000
349	00:00:13.751000
350	00:00:13.791000
351	00:00:13.830000
352	00:00:13.870000
353	00:00:13.909000
354	00:00:13.949000
355	00:00:13.988000
356	00:00:14.028000
357	00:00:14.067000
358	00:00:14.107000
359	00:00:14.146000
360	00:00:14.186000
361	00:00:14.225000
362	00:00:14.265000
363	00:00:14.304000
364	00:00:14.344000
365	00:00:14.383000
366	00:00:14.423000
367	00:00:14.462000
368	00:00:14.502000
369	00:00:14.541000
370	00:00:14.581000
371	00:00:14.620000
372	00:00:14.660000
373	00:00:14.699000
374	00:00:14.739000
375	00:00:14.778000
376	00:00:14.818000
377	00:00:14.857000
378	00:00:14.897000
379	00:00:14.936000
380	00:00:14.976000
381	00:00:15.015000
382	00:00:15.055000
383	00:00:15.095000
384	00:00:15.134000
385	00:00:15.174000
386	00:00:15.213000
387	00:00:15.253000
388	00:00:15.293000
389	00:00:15.333000
390	00:00:15.372000
391	00:00:15.412000
392	00:00:15.451000
393	00:00:15.491000
394	00:00:15.530000
395	00:00:15.570000
396	00:00:15.609000
397	00:00:15.649000
398	00:00:15.688000
399	00:00:15.728000
400	00:00:15.767000
401	00:00:15.807000
402	00:00:15.846000
403	00:00:15.886000
404	00:00:15.925000
405	00:00:15.965000
406	00:00:16.004000
407	00:00:16.044000
408	00:00:16.083000
409	00:00:16.123000
410	00:00:16.162000
411	00:00:16.202000
412	00:00:16.241000
413	00:00:16.281000
414	00:00:16.320000
415	00:00:16.360000
416	00:00:16.399000
417	00:00:16.439000
418	00:00:16.478000
419	00:00:16.518000
420	00:00:16.557000
421	00:00:16.597000
422	00:00:16.637000
423	00:00:16.676000
424	00:00:16.715000
425	00:00:16.755000
426	00:00:16.795000
427	00:00:16.834000
428	00:00:16.873000
429	00:00:16.913000
430	00:00:16.953000
431	00:00:16.992000
432	00:00:17.032000
433	00:00:17.071000
434	00:00:17.111000
435	00:00:17.150000
436	00:00:17.190000
437	00:00:17.229000
438	00:00:17.269000
439	00:00:17.308000
440	00:00:17.348000
441	00:00:17.387000
442	00:00:17.427000
443	00:00:17.466000
444	00:00:17.506000
445	00:00:17.545000
446	00:00:17.585000
447	00:00:17.624000
448	00:00:17.664000
449	00:00:17.703000
450	00:00:17.743000
451	00:00:17.782000
452	00:00:17.822000
453	00:00:17.861000
454	00:00:17.901000
455	00:00:17.940000
456	00:00:17.980000
457	00:00:18.019000
458	00:00:18.059000
459	00:00:18.098000
460	00:00:18.138000
461	00:00:18.177000
462	00:00:18.217000
463	00:00:18.256000
464	00:00:18.296000
465	00:00:18.335000
466	00:00:18.375000
467	00:00:18.415000
468	00:00:18.454000
469	00:00:18.494000
470	00:00:18.533000
471	00:00:18.573000
472	00:00:18.612000
473	00:00:18.652000
474	00:00:18.691000
475	00:00:18.731000
476	00:00:18.770000
477	00:00:18.810000
478	00:00:18.849000
479	00:00:18.889000
480	00:00:18.928000
481	00:00:18.968000
482	00:00:19.007000
483	00:00:19.047000
484	00:00:19.086000
485	00:00:19.126000
486	00:00:19.165000
487	00:00:19.205000
488	00:00:19.244000
489	00:00:19.284000
490	00:00:19.323000
491	00:00:19.363000
492	00:00:19.402000
493	00:00:19.442000
494	00:00:19.481000
495	00:00:19.521000
496	00:00:19.560000
497	00:00:19.600000
498	00:00:19.639000
499	00:00:19.679000
500	00:00:19.718000
501	00:00:19.758000
502	00:00:19.797000
503	00:00:19.837000
504	00:00:19.876000
505	00:00:19.916000
506	00:00:19.956000
507	00:00:19.995000
508	00:00:20.035000
509	00:00:20.074000
510	00:00:20.114000
511	00:00:20.153000
512	00:00:20.193000
513	00:00:20.232000
514	00:00:20.272000
515	00:00:20.311000
516	00:00:20.351000
517	00:00:20.390000
518	00:00:20.430000
519	00:00:20.469000
520	00:00:20.509000
521	00:00:20.548000
522	00:00:20.588000
523	00:00:20.627000
524	00:00:20.667000
525	00:00:20.706000
526	00:00:20.746000
527	00:00:20.785000
528	00:00:20.825000
529	00:00:20.864000
530	00:00:20.904000
531	00:00:20.943000
532	00:00:20.983000
533	00:00:21.022000
534	00:00:21.062000
535	00:00:21.101000
536	00:00:21.141000
537	00:00:21.180000
538	00:00:21.220000
539	00:00:21.259000
540	00:00:21.299000
541	00:00:21.338000
542	00:00:21.378000
543	00:00:21.418000
544	00:00:21.457000
545	00:00:21.497000
546	00:00:21.536000
547	00:00:21.576000
548	00:00:21.615000
549	00:00:21.654000
550	00:00:21.694000
551	00:00:21.734000
552	00:00:21.773000
553	00:00:21.813000
554	00:00:21.852000
555	00:00:21.892000
556	00:00:21.931000
557	00:00:21.971000
558	00:00:22.010000
559	00:00:22.050000
560	00:00:22.089000
561	00:00:22.129000
562	00:00:22.168000
563	00:00:22.208000
564	00:00:22.247000
565	00:00:22.287000
566	00:00:22.326000
567	00:00:22.366000
568	00:00:22.405000
569	00:00:22.445000
570	00:00:22.484000
571	00:00:22.524000
572	00:00:22.563000
573	00:00:22.603000
574	00:00:22.642000
575	00:00:22.682000
576	00:00:22.721000
577	00:00:22.761000
578	00:00:22.800000
579	00:00:22.840000
580	00:00:22.879000
581	00:00:22.919000
582	00:00:22.958000
583	00:00:22.998000
584	00:00:23.037000
585	00:00:23.077000
586	00:00:23.116000
587	00:00:23.156000
588	00:00:23.195000
589	00:00:23.235000
590	00:00:23.275000
591	00:00:23.314000
592	00:00:23.354000
593	00:00:23.393000
594	00:00:23.433000
595	00:00:23.472000
596	00:00:23.512000
597	00:00:23.551000
598	00:00:23.591000
599	00:00:23.630000
600	00:00:23.670000
601	00:00:23.709000
602	00:00:23.749000
603	00:00:23.788000
604	00:00:23.828000
605	00:00:23.867000
606	00:00:23.907000
607	00:00:23.946000
608	00:00:23.986000
609	00:00:24.025000
610	00:00:24.065000
611	00:00:24.104000
612	00:00:24.144000
613	00:00:24.183000
614	00:00:24.223000
615	00:00:24.262000
616	00:00:24.302000
617	00:00:24.341000
618	00:00:24.381000
619	00:00:24.420000
620	00:00:24.460000
621	00:00:24.499000
622	00:00:24.539000
623	00:00:24.578000
624	00:00:24.618000
625	00:00:24.657000
626	00:00:24.697000
627	00:00:24.737000
628	00:00:24.776000
629	00:00:24.816000
630	00:00:24.855000
631	00:00:24.895000
632	00:00:24.934000
633	00:00:24.974000
634	00:00:25.013000
635	00:00:25.053000
636	00:00:25.092000
637	00:00:25.132000
638	00:00:25.171000
639	00:00:25.211000
640	00:00:25.250000
641	00:00:25.291000
642	00:00:25.330000
643	00:00:25.370000
644	00:00:25.409000
645	00:00:25.449000
646	00:00:25.488000
647	00:00:25.528000
648	00:00:25.567000
649	00:00:25.607000
650	00:00:25.646000
651	00:00:25.686000
652	00:00:25.725000
653	00:00:25.765000
654	00:00:25.804000
655	00:00:25.844000
656	00:00:25.883000
657	00:00:25.923000
658	00:00:25.962000
659	00:00:26.002000
660	00:00:26.041000
661	00:00:26.081000
662	00:00:26.120000
663	00:00:26.160000
664	00:00:26.199000
665	00:00:26.239000
666	00:00:26.279000
667	00:00:26.318000
668	00:00:26.358000
669	00:00:26.397000
670	00:00:26.436000
671	00:00:26.476000
672	00:00:26.515000
673	00:00:26.555000
674	00:00:26.595000
675	00:00:26.634000
676	00:00:26.674000
677	00:00:26.713000
678	00:00:26.753000
679	00:00:26.792000
680	00:00:26.832000
681	00:00:26.871000
682	00:00:26.911000
683	00:00:26.950000
684	00:00:26.990000
685	00:00:27.029000
686	00:00:27.069000
687	00:00:27.108000
688	00:00:27.148000
689	00:00:27.187000
690	00:00:27.227000
691	00:00:27.266000
692	00:00:27.306000
693	00:00:27.345000
694	00:00:27.385000
695	00:00:27.424000
696	00:00:27.464000
697	00:00:27.503000
698	00:00:27.543000
699	00:00:27.582000
700	00:00:27.622000
701	00:00:27.661000
702	00:00:27.701000
703	00:00:27.740000
704	00:00:27.780000
705	00:00:27.819000
706	00:00:27.859000
707	00:00:27.898000
708	00:00:27.938000
709	00:00:27.977000
710	00:00:28.017000
711	00:00:28.057000
712	00:00:28.096000
713	00:00:28.136000
714	00:00:28.175000
715	00:00:28.215000
716	00:00:28.254000
717	00:00:28.294000
718	00:00:28.333000
719	00:00:28.373000
720	00:00:28.412000
721	00:00:28.452000
722	00:00:28.491000
723	00:00:28.531000
724	00:00:28.570000
725	00:00:28.610000
726	00:00:28.649000
727	00:00:28.689000
728	00:00:28.728000
729	00:00:28.768000
730	00:00:28.807000
731	00:00:28.847000
732	00:00:28.886000
733	00:00:28.926000
734	00:00:28.965000
735	00:00:29.005000
736	00:00:29.044000
737	00:00:29.084000
738	00:00:29.123000
739	00:00:29.163000
740	00:00:29.202000
741	00:00:29.242000
742	00:00:29.281000
743	00:00:29.321000
744	00:00:29.360000
745	00:00:29.400000
746	00:00:29.439000
747	00:00:29.479000
748	00:00:29.518000
749	00:00:29.558000
750	00:00:29.598000
751	00:00:29.637000
752	00:00:29.677000
753	00:00:29.716000
754	00:00:29.756000
755	00:00:29.795000
756	00:00:29.835000
757	00:00:29.874000
758	00:00:29.914000
759	00:00:29.953000
760	00:00:29.993000
761	00:00:30.032000
762	00:00:30.072000
763	00:00:30.111000
764	00:00:30.151000
765	00:00:30.190000
766	00:00:30.230000
767	00:00:30.269000
768	00:00:30.309000
769	00:00:30.348000
770	00:00:30.388000
771	00:00:30.427000
772	00:00:30.467000
773	00:00:30.506000
774	00:00:30.546000
775	00:00:30.585000
776	00:00:30.625000
777	00:00:30.664000
778	00:00:30.704000
779	00:00:30.743000
780	00:00:30.783000
781	00:00:30.822000
782	00:00:30.862000
783	00:00:30.901000
784	00:00:30.941000
785	00:00:30.980000
786	00:00:31.020000
787	00:00:31.060000
788	00:00:31.099000
789	00:00:31.139000
790	00:00:31.178000
791	00:00:31.218000
792	00:00:31.257000
793	00:00:31.296000
794	00:00:31.336000
795	00:00:31.376000
796	00:00:31.415000
797	00:00:31.455000
798	00:00:31.494000
799	00:00:31.534000
800	00:00:31.573000
801	00:00:31.613000
802	00:00:31.652000
803	00:00:31.692000
804	00:00:31.731000
805	00:00:31.771000
806	00:00:31.810000
807	00:00:31.850000
808	00:00:31.889000
809	00:00:31.929000
810	00:00:31.968000
811	00:00:32.008000
812	00:00:32.047000
813	00:00:32.087000
814	00:00:32.126000
815	00:00:32.166000
816	00:00:32.205000
817	00:00:32.245000
818	00:00:32.284000
819	00:00:32.324000
820	00:00:32.363000
821	00:00:32.403000
822	00:00:32.442000
823	00:00:32.482000
824	00:00:32.521000
825	00:00:32.561000
826	00:00:32.600000
827	00:00:32.640000
828	00:00:32.679000
829	00:00:32.719000
830	00:00:32.758000
831	00:00:32.798000
832	00:00:32.837000
833	00:00:32.877000
834	00:00:32.917000
835	00:00:32.956000
836	00:00:32.996000
837	00:00:33.035000
838	00:00:33.075000
839	00:00:33.114000
840	00:00:33.154000
841	00:00:33.193000
842	00:00:33.233000
843	00:00:33.272000
844	00:00:33.312000
845	00:00:33.351000
846	00:00:33.391000
847	00:00:33.430000
848	00:00:33.470000
849	00:00:33.509000
850	00:00:33.549000
851	00:00:33.588000
852	00:00:33.628000
853	00:00:33.667000
854	00:00:33.707000
855	00:00:33.746000
856	00:00:33.786000
857	00:00:33.825000
858	00:00:33.865000
859	00:00:33.904000
860	00:00:33.944000
861	00:00:33.983000
862	00:00:34.023000
863	00:00:34.062000
864	00:00:34.102000
865	00:00:34.141000
866	00:00:34.181000
867	00:00:34.220000
868	00:00:34.260000
869	00:00:34.299000
870	00:00:34.339000
871	00:00:34.379000
872	00:00:34.418000
873	00:00:34.458000
874	00:00:34.497000
875	00:00:34.537000
876	00:00:34.576000
877	00:00:34.616000
878	00:00:34.655000
879	00:00:34.695000
880	00:00:34.734000
881	00:00:34.774000
882	00:00:34.813000
883	00:00:34.853000
884	00:00:34.892000
885	00:00:34.932000
886	00:00:34.971000
887	00:00:35.011000
888	00:00:35.050000
889	00:00:35.090000
890	00:00:35.129000
891	00:00:35.169000
892	00:00:35.208000
893	00:00:35.248000
894	00:00:35.288000
895	00:00:35.328000
896	00:00:35.367000
897	00:00:35.407000
898	00:00:35.446000
899	00:00:35.486000
900	00:00:35.525000
901	00:00:35.565000
902	00:00:35.604000
903	00:00:35.644000
904	00:00:35.683000
905	00:00:35.723000
906	00:00:35.762000
907	00:00:35.802000
908	00:00:35.841000
909	00:00:35.881000
910	00:00:35.921000
911	00:00:35.960000
912	00:00:36
913	00:00:36.039000
914	00:00:36.078000
915	00:00:36.118000
916	00:00:36.157000
917	00:00:36.197000
918	00:00:36.237000
919	00:00:36.276000
920	00:00:36.316000
921	00:00:36.355000
922	00:00:36.395000
923	00:00:36.434000
924	00:00:36.474000
925	00:00:36.513000
926	00:00:36.553000
927	00:00:36.592000
928	00:00:36.632000
929	00:00:36.671000
930	00:00:36.711000
931	00:00:36.750000
932	00:00:36.790000
933	00:00:36.829000
934	00:00:36.869000
935	00:00:36.908000
936	00:00:36.948000
937	00:00:36.987000
938	00:00:37.027000
939	00:00:37.066000
940	00:00:37.106000
941	00:00:37.145000
942	00:00:37.185000
943	00:00:37.224000
944	00:00:37.264000
945	00:00:37.303000
946	00:00:37.343000
947	00:00:37.382000
948	00:00:37.422000
949	00:00:37.461000
950	00:00:37.501000
951	00:00:37.540000
952	00:00:37.580000
953	00:00:37.619000
954	00:00:37.659000
955	00:00:37.699000
956	00:00:37.738000
957	00:00:37.778000
958	00:00:37.817000
959	00:00:37.857000
960	00:00:37.896000
961	00:00:37.936000
962	00:00:37.975000
963	00:00:38.015000
964	00:00:38.054000
965	00:00:38.094000
966	00:00:38.133000
967	00:00:38.173000
968	00:00:38.212000
969	00:00:38.252000
970	00:00:38.291000
971	00:00:38.331000
972	00:00:38.370000
973	00:00:38.410000
974	00:00:38.449000
975	00:00:38.489000
976	00:00:38.528000
977	00:00:38.568000
978	00:00:38.607000
979	00:00:38.647000
980	00:00:38.686000
981	00:00:38.726000
982	00:00:38.765000
983	00:00:38.805000
984	00:00:38.844000
985	00:00:38.884000
986	00:00:38.923000
987	00:00:38.963000
988	00:00:39.002000
989	00:00:39.042000
990	00:00:39.081000
991	00:00:39.121000
992	00:00:39.160000
993	00:00:39.200000
994	00:00:39.240000
995	00:00:39.279000
996	00:00:39.319000
997	00:00:39.358000
998	00:00:39.398000
999	00:00:39.437000
1000	00:00:39.477000
1001	00:00:39.516000
1002	00:00:39.556000
1003	00:00:39.595000
1004	00:00:39.635000
1005	00:00:39.674000
1006	00:00:39.714000
1007	00:00:39.753000
1008	00:00:39.793000
1009	00:00:39.832000
1010	00:00:39.872000
1011	00:00:39.911000
1012	00:00:39.951000
1013	00:00:39.990000
1014	00:00:40.030000
1015	00:00:40.069000
1016	00:00:40.109000
1017	00:00:40.148000
1018	00:00:40.188000
1019	00:00:40.227000
1020	00:00:40.267000
1021	00:00:40.306000
1022	00:00:40.346000
1023	00:00:40.385000
1024	00:00:40.425000
1025	00:00:40.464000
1026	00:00:40.504000
1027	00:00:40.543000
1028	00:00:40.583000
1029	00:00:40.622000
1030	00:00:40.662000
1031	00:00:40.702000
1032	00:00:40.741000
1033	00:00:40.781000
1034	00:00:40.820000
1035	00:00:40.860000
1036	00:00:40.899000
1037	00:00:40.939000
1038	00:00:40.978000
1039	00:00:41.018000
1040	00:00:41.057000
1041	00:00:41.097000
1042	00:00:41.136000
1043	00:00:41.176000
1044	00:00:41.215000
1045	00:00:41.255000
1046	00:00:41.294000
1047	00:00:41.334000
1048	00:00:41.373000
1049	00:00:41.413000
1050	00:00:41.452000
1051	00:00:41.492000
1052	00:00:41.531000
1053	00:00:41.571000
1054	00:00:41.610000
1055	00:00:41.650000
1056	00:00:41.689000
1057	00:00:41.729000
1058	00:00:41.768000
1059	00:00:41.808000
1060	00:00:41.847000
1061	00:00:41.887000
1062	00:00:41.926000
1063	00:00:41.966000
1064	00:00:42.005000
1065	00:00:42.045000
1066	00:00:42.084000
1067	00:00:42.124000
1068	00:00:42.163000
1069	00:00:42.203000
1070	00:00:42.242000
1071	00:00:42.282000
1072	00:00:42.321000
1073	00:00:42.361000
1074	00:00:42.400000
1075	00:00:42.440000
1076	00:00:42.479000
1077	00:00:42.519000
1078	00:00:42.559000
1079	00:00:42.598000
1080	00:00:42.638000
1081	00:00:42.677000
1082	00:00:42.717000
1083	00:00:42.756000
1084	00:00:42.796000
1085	00:00:42.835000
1086	00:00:42.875000
1087	00:00:42.914000
1088	00:00:42.954000
1089	00:00:42.993000
1090	00:00:43.033000
1091	00:00:43.072000
1092	00:00:43.112000
1093	00:00:43.151000
1094	00:00:43.191000
1095	00:00:43.230000
1096	00:00:43.270000
1097	00:00:43.309000
1098	00:00:43.349000
1099	00:00:43.388000
1100	00:00:43.428000
1101	00:00:43.467000
1102	00:00:43.507000
1103	00:00:43.546000
1104	00:00:43.586000
1105	00:00:43.625000
1106	00:00:43.665000
1107	00:00:43.704000
1108	00:00:43.744000
1109	00:00:43.783000
1110	00:00:43.823000
1111	00:00:43.862000
1112	00:00:43.902000
1113	00:00:43.941000
1114	00:00:43.981000
1115	00:00:44.021000
1116	00:00:44.060000
1117	00:00:44.100000
1118	00:00:44.139000
1119	00:00:44.179000
1120	00:00:44.218000
1121	00:00:44.258000
1122	00:00:44.297000
1123	00:00:44.337000
1124	00:00:44.376000
1125	00:00:44.416000
1126	00:00:44.455000
1127	00:00:44.495000
1128	00:00:44.534000
1129	00:00:44.574000
1130	00:00:44.613000
1131	00:00:44.653000
1132	00:00:44.692000
1133	00:00:44.732000
1134	00:00:44.771000
1135	00:00:44.811000
1136	00:00:44.850000
1137	00:00:44.890000
1138	00:00:44.929000
1139	00:00:44.969000
1140	00:00:45.008000
1141	00:00:45.048000
1142	00:00:45.087000
1143	00:00:45.127000
1144	00:00:45.166000
1145	00:00:45.206000
1146	00:00:45.245000
1147	00:00:45.286000
1148	00:00:45.325000
1149	00:00:45.365000
1150	00:00:45.404000
1151	00:00:45.444000
1152	00:00:45.483000
1153	00:00:45.523000
1154	00:00:45.563000
1155	00:00:45.602000
1156	00:00:45.642000
1157	00:00:45.681000
1158	00:00:45.721000
1159	00:00:45.760000
1160	00:00:45.800000
1161	00:00:45.839000
1162	00:00:45.879000
1163	00:00:45.918000
1164	00:00:45.958000
1165	00:00:45.997000
1166	00:00:46.037000
1167	00:00:46.076000
1168	00:00:46.116000
1169	00:00:46.155000
1170	00:00:46.195000
1171	00:00:46.234000
1172	00:00:46.274000
1173	00:00:46.313000
1174	00:00:46.353000
1175	00:00:46.392000
1176	00:00:46.432000
1177	00:00:46.471000
1178	00:00:46.511000
1179	00:00:46.550000
1180	00:00:46.590000
1181	00:00:46.629000
1182	00:00:46.669000
1183	00:00:46.708000
1184	00:00:46.748000
1185	00:00:46.787000
1186	00:00:46.827000
1187	00:00:46.866000
1188	00:00:46.906000
1189	00:00:46.945000
1190	00:00:46.985000
1191	00:00:47.024000
1192	00:00:47.064000
1193	00:00:47.103000
1194	00:00:47.143000
1195	00:00:47.182000
1196	00:00:47.222000
1197	00:00:47.261000
1198	00:00:47.301000
1199	00:00:47.341000
1200	00:00:47.380000
1201	00:00:47.420000
1202	00:00:47.459000
1203	00:00:47.499000
1204	00:00:47.538000
1205	00:00:47.578000
1206	00:00:47.617000
1207	00:00:47.657000
1208	00:00:47.696000
1209	00:00:47.736000
1210	00:00:47.775000
1211	00:00:47.815000
1212	00:00:47.854000
1213	00:00:47.894000
1214	00:00:47.933000
1215	00:00:47.973000
1216	00:00:48.012000
1217	00:00:48.052000
1218	00:00:48.091000
1219	00:00:48.131000
1220	00:00:48.170000
1221	00:00:48.210000
1222	00:00:48.249000
1223	00:00:48.289000
1224	00:00:48.328000
1225	00:00:48.368000
1226	00:00:48.407000
1227	00:00:48.447000
1228	00:00:48.486000
1229	00:00:48.526000
1230	00:00:48.565000
1231	00:00:48.605000
1232	00:00:48.644000
1233	00:00:48.684000
1234	00:00:48.723000
1235	00:00:48.763000
1236	00:00:48.802000
1237	00:00:48.842000
1238	00:00:48.882000
1239	00:00:48.921000
1240	00:00:48.961000
1241	00:00:49
1242	00:00:49.040000
1243	00:00:49.079000
1244	00:00:49.119000
1245	00:00:49.158000
1246	00:00:49.198000
1247	00:00:49.237000
1248	00:00:49.277000
1249	00:00:49.316000
1250	00:00:49.356000
1251	00:00:49.395000
1252	00:00:49.435000
1253	00:00:49.474000
1254	00:00:49.514000
1255	00:00:49.553000
1256	00:00:49.593000
1257	00:00:49.632000
1258	00:00:49.672000
1259	00:00:49.711000
1260	00:00:49.751000
1261	00:00:49.790000
1262	00:00:49.830000
1263	00:00:49.869000
1264	00:00:49.909000
1265	00:00:49.948000
1266	00:00:49.988000
1267	00:00:50.027000
1268	00:00:50.067000
1269	00:00:50.106000
1270	00:00:50.146000
1271	00:00:50.185000
1272	00:00:50.225000
1273	00:00:50.264000
1274	00:00:50.304000
1275	00:00:50.344000
1276	00:00:50.383000
1277	00:00:50.423000
1278	00:00:50.462000
1279	00:00:50.502000
1280	00:00:50.541000
1281	00:00:50.581000
1282	00:00:50.620000
1283	00:00:50.660000
1284	00:00:50.699000
1285	00:00:50.739000
1286	00:00:50.778000
1287	00:00:50.818000
1288	00:00:50.857000
1289	00:00:50.897000
1290	00:00:50.936000
1291	00:00:50.976000
1292	00:00:51.015000
1293	00:00:51.055000
1294	00:00:51.094000
1295	00:00:51.134000
1296	00:00:51.173000
1297	00:00:51.213000
1298	00:00:51.252000
1299	00:00:51.292000
1300	00:00:51.331000
1301	00:00:51.371000
1302	00:00:51.410000
1303	00:00:51.450000
1304	00:00:51.489000
1305	00:00:51.529000
1306	00:00:51.568000
1307	00:00:51.608000
1308	00:00:51.647000
1309	00:00:51.687000
1310	00:00:51.726000
1311	00:00:51.766000
1312	00:00:51.805000
1313	00:00:51.845000
1314	00:00:51.884000
1315	00:00:51.924000
1316	00:00:51.963000
1317	00:00:52.003000
1318	00:00:52.042000
1319	00:00:52.082000
1320	00:00:52.121000
1321	00:00:52.161000
1322	00:00:52.201000
1323	00:00:52.240000
1324	00:00:52.280000
1325	00:00:52.319000
1326	00:00:52.359000
1327	00:00:52.398000
1328	00:00:52.438000
1329	00:00:52.477000
1330	00:00:52.517000
1331	00:00:52.556000
1332	00:00:52.596000
1333	00:00:52.635000
1334	00:00:52.675000
1335	00:00:52.714000
1336	00:00:52.754000
1337	00:00:52.793000
1338	00:00:52.833000
1339	00:00:52.872000
1340	00:00:52.912000
1341	00:00:52.951000
1342	00:00:52.991000
1343	00:00:53.030000
1344	00:00:53.070000
1345	00:00:53.109000
1346	00:00:53.149000
1347	00:00:53.188000
1348	00:00:53.228000
1349	00:00:53.267000
1350	00:00:53.307000
1351	00:00:53.346000
1352	00:00:53.386000
1353	00:00:53.425000
1354	00:00:53.465000
1355	00:00:53.504000
1356	00:00:53.544000
1357	00:00:53.583000
1358	00:00:53.623000
1359	00:00:53.663000
1360	00:00:53.702000
1361	00:00:53.742000
1362	00:00:53.781000
1363	00:00:53.821000
1364	00:00:53.860000
1365	00:00:53.900000
1366	00:00:53.939000
1367	00:00:53.979000
1368	00:00:54.018000
1369	00:00:54.058000
1370	00:00:54.097000
1371	00:00:54.137000
1372	00:00:54.176000
1373	00:00:54.216000
1374	00:00:54.255000
1375	00:00:54.295000
1376	00:00:54.334000
1377	00:00:54.374000
1378	00:00:54.413000
1379	00:00:54.453000
1380	00:00:54.492000
1381	00:00:54.532000
1382	00:00:54.571000
1383	00:00:54.611000
1384	00:00:54.650000
1385	00:00:54.690000
1386	00:00:54.729000
1387	00:00:54.769000
1388	00:00:54.808000
1389	00:00:54.848000
1390	00:00:54.887000
1391	00:00:54.927000
1392	00:00:54.966000
1393	00:00:55.006000
1394	00:00:55.045000
1395	00:00:55.085000
1396	00:00:55.124000
1397	00:00:55.164000
1398	00:00:55.204000
1399	00:00:55.243000
1400	00:00:55.284000
1401	00:00:55.323000
1402	00:00:55.362000
1403	00:00:55.402000
1404	00:00:55.442000
1405	00:00:55.481000
1406	00:00:55.521000
1407	00:00:55.560000
1408	00:00:55.600000
1409	00:00:55.639000
1410	00:00:55.679000
1411	00:00:55.718000
1412	00:00:55.758000
1413	00:00:55.797000
1414	00:00:55.837000
1415	00:00:55.876000
1416	00:00:55.916000
1417	00:00:55.955000
1418	00:00:55.995000
1419	00:00:56.034000
1420	00:00:56.074000
1421	00:00:56.113000
1422	00:00:56.153000
1423	00:00:56.192000
1424	00:00:56.232000
1425	00:00:56.271000
1426	00:00:56.311000
1427	00:00:56.350000
1428	00:00:56.390000
1429	00:00:56.429000
1430	00:00:56.469000
1431	00:00:56.508000
1432	00:00:56.548000
1433	00:00:56.587000
1434	00:00:56.627000
1435	00:00:56.667000
1436	00:00:56.706000
1437	00:00:56.745000
1438	00:00:56.785000
1439	00:00:56.824000
1440	00:00:56.864000
1441	00:00:56.903000
1442	00:00:56.943000
1443	00:00:56.983000
1444	00:00:57.022000
1445	00:00:57.062000
1446	00:00:57.101000
1447	00:00:57.141000
1448	00:00:57.180000
1449	00:00:57.220000
1450	00:00:57.259000
1451	00:00:57.299000
1452	00:00:57.338000
1453	00:00:57.378000
1454	00:00:57.417000
1455	00:00:57.457000
1456	00:00:57.496000
1457	00:00:57.536000
1458	00:00:57.575000
1459	00:00:57.615000
1460	00:00:57.654000
1461	00:00:57.694000
1462	00:00:57.733000
1463	00:00:57.773000
1464	00:00:57.812000
1465	00:00:57.852000
1466	00:00:57.891000
1467	00:00:57.931000
1468	00:00:57.970000
1469	00:00:58.010000
1470	00:00:58.049000
1471	00:00:58.089000
1472	00:00:58.128000
1473	00:00:58.168000
1474	00:00:58.207000
1475	00:00:58.247000
1476	00:00:58.286000
1477	00:00:58.326000
1478	00:00:58.365000
1479	00:00:58.405000

## Sheet: #8
frame	time	PC	TB	ant isth	mid isth	post isth
130	00:00:05.097000
131	00:00:05.136000
132	00:00:05.176000
133	00:00:05.216000
134	00:00:05.255000
135	00:00:05.296000
136	00:00:05.335000
137	00:00:05.375000
138	00:00:05.414000
139	00:00:05.454000
140	00:00:05.493000
141	00:00:05.533000
142	00:00:05.572000
143	00:00:05.612000
144	00:00:05.651000
145	00:00:05.691000
146	00:00:05.730000
147	00:00:05.770000
148	00:00:05.809000
149	00:00:05.849000
150	00:00:05.888000
151	00:00:05.928000
152	00:00:05.967000
153	00:00:06.007000
154	00:00:06.046000
155	00:00:06.086000
156	00:00:06.125000
157	00:00:06.165000
158	00:00:06.204000
159	00:00:06.244000
160	00:00:06.283000
161	00:00:06.323000
162	00:00:06.362000
163	00:00:06.402000
164	00:00:06.441000
165	00:00:06.481000
166	00:00:06.520000
167	00:00:06.560000
168	00:00:06.599000
169	00:00:06.639000
170	00:00:06.679000
171	00:00:06.718000
172	00:00:06.758000
173	00:00:06.797000
174	00:00:06.837000
175	00:00:06.876000
176	00:00:06.916000
177	00:00:06.955000
178	00:00:06.995000
179	00:00:07.034000
180	00:00:07.074000
181	00:00:07.113000
182	00:00:07.153000
183	00:00:07.192000
184	00:00:07.232000
185	00:00:07.271000
186	00:00:07.311000
187	00:00:07.350000
188	00:00:07.390000
189	00:00:07.429000
190	00:00:07.469000
191	00:00:07.508000
192	00:00:07.548000
193	00:00:07.587000
194	00:00:07.627000
195	00:00:07.666000
196	00:00:07.706000
197	00:00:07.745000
198	00:00:07.785000
199	00:00:07.824000
200	00:00:07.864000
201	00:00:07.903000
202	00:00:07.943000
203	00:00:07.982000
204	00:00:08.022000
205	00:00:08.061000
206	00:00:08.101000
207	00:00:08.140000
208	00:00:08.180000
209	00:00:08.220000
210	00:00:08.259000
211	00:00:08.299000
212	00:00:08.338000
213	00:00:08.378000
214	00:00:08.417000
215	00:00:08.457000
216	00:00:08.496000
217	00:00:08.536000
218	00:00:08.575000
219	00:00:08.615000
220	00:00:08.654000
221	00:00:08.694000
222	00:00:08.733000
223	00:00:08.773000
224	00:00:08.812000
225	00:00:08.852000
226	00:00:08.891000
227	00:00:08.931000
228	00:00:08.970000
229	00:00:09.010000
230	00:00:09.049000
231	00:00:09.089000
232	00:00:09.128000
233	00:00:09.168000
234	00:00:09.207000
235	00:00:09.247000
236	00:00:09.286000
237	00:00:09.326000
238	00:00:09.365000
239	00:00:09.405000
240	00:00:09.444000
241	00:00:09.484000
242	00:00:09.523000
243	00:00:09.563000
244	00:00:09.602000
245	00:00:09.642000
246	00:00:09.681000
247	00:00:09.721000
248	00:00:09.761000
249	00:00:09.800000
250	00:00:09.839000
251	00:00:09.879000
252	00:00:09.919000
253	00:00:09.958000
254	00:00:09.998000
255	00:00:10.037000
256	00:00:10.077000
257	00:00:10.116000
258	00:00:10.156000
259	00:00:10.195000
260	00:00:10.235000
261	00:00:10.274000
262	00:00:10.314000
263	00:00:10.353000
264	00:00:10.393000
265	00:00:10.432000
266	00:00:10.472000
267	00:00:10.511000
268	00:00:10.551000
269	00:00:10.590000
270	00:00:10.630000
271	00:00:10.669000
272	00:00:10.709000
273	00:00:10.748000
274	00:00:10.788000
275	00:00:10.827000
276	00:00:10.867000
277	00:00:10.906000
278	00:00:10.946000
279	00:00:10.985000
280	00:00:11.025000
281	00:00:11.064000
282	00:00:11.104000
283	00:00:11.143000
284	00:00:11.183000
285	00:00:11.222000
286	00:00:11.262000
287	00:00:11.301000
288	00:00:11.341000
289	00:00:11.380000
290	00:00:11.420000
291	00:00:11.459000
292	00:00:11.499000
293	00:00:11.539000
294	00:00:11.578000
295	00:00:11.618000
296	00:00:11.657000
297	00:00:11.697000
298	00:00:11.736000
299	00:00:11.776000
300	00:00:11.815000
301	00:00:11.855000
302	00:00:11.894000
303	00:00:11.934000
304	00:00:11.973000
305	00:00:12.013000
306	00:00:12.052000
307	00:00:12.092000
308	00:00:12.131000
309	00:00:12.171000
310	00:00:12.210000
311	00:00:12.250000
312	00:00:12.289000
313	00:00:12.329000
314	00:00:12.368000
315	00:00:12.408000
316	00:00:12.447000
317	00:00:12.487000
318	00:00:12.526000
319	00:00:12.566000
320	00:00:12.605000
321	00:00:12.645000
322	00:00:12.684000
323	00:00:12.724000
324	00:00:12.763000
325	00:00:12.803000
326	00:00:12.842000
327	00:00:12.882000
328	00:00:12.921000
329	00:00:12.961000
330	00:00:13.001000
331	00:00:13.040000
332	00:00:13.080000
333	00:00:13.119000
334	00:00:13.159000
335	00:00:13.198000
336	00:00:13.238000
337	00:00:13.277000
338	00:00:13.317000
339	00:00:13.356000
340	00:00:13.396000
341	00:00:13.435000
342	00:00:13.475000
343	00:00:13.514000
344	00:00:13.554000
345	00:00:13.593000
346	00:00:13.633000
347	00:00:13.672000
348	00:00:13.712000
349	00:00:13.751000
350	00:00:13.791000
351	00:00:13.830000
352	00:00:13.870000
353	00:00:13.909000
354	00:00:13.949000
355	00:00:13.988000
356	00:00:14.028000
357	00:00:14.067000
358	00:00:14.107000
359	00:00:14.146000
360	00:00:14.186000
361	00:00:14.225000
362	00:00:14.265000
363	00:00:14.304000
364	00:00:14.344000
365	00:00:14.383000
366	00:00:14.423000
367	00:00:14.462000
368	00:00:14.502000
369	00:00:14.541000
370	00:00:14.581000
371	00:00:14.620000
372	00:00:14.660000
373	00:00:14.699000
374	00:00:14.739000
375	00:00:14.778000
376	00:00:14.818000
377	00:00:14.858000
378	00:00:14.897000
379	00:00:14.937000
380	00:00:14.976000
381	00:00:15.016000
382	00:00:15.055000
383	00:00:15.095000
384	00:00:15.134000
385	00:00:15.174000
386	00:00:15.213000
387	00:00:15.253000
388	00:00:15.293000
389	00:00:15.333000
390	00:00:15.372000
391	00:00:15.412000
392	00:00:15.451000
393	00:00:15.491000
394	00:00:15.530000
395	00:00:15.570000
396	00:00:15.609000
397	00:00:15.649000
398	00:00:15.688000
399	00:00:15.728000
400	00:00:15.767000
401	00:00:15.807000
402	00:00:15.846000
403	00:00:15.886000
404	00:00:15.925000
405	00:00:15.965000
406	00:00:16.004000
407	00:00:16.044000
408	00:00:16.083000
409	00:00:16.123000
410	00:00:16.162000
411	00:00:16.202000
412	00:00:16.241000
413	00:00:16.281000
414	00:00:16.321000
415	00:00:16.360000
416	00:00:16.400000
417	00:00:16.439000
418	00:00:16.479000
419	00:00:16.518000
420	00:00:16.558000
421	00:00:16.597000
422	00:00:16.637000
423	00:00:16.676000
424	00:00:16.716000
425	00:00:16.755000
426	00:00:16.795000
427	00:00:16.834000
428	00:00:16.874000
429	00:00:16.913000
430	00:00:16.953000
431	00:00:16.992000
432	00:00:17.032000
433	00:00:17.071000
434	00:00:17.111000
435	00:00:17.150000
436	00:00:17.190000
437	00:00:17.229000
438	00:00:17.269000
439	00:00:17.308000
440	00:00:17.348000
441	00:00:17.387000
442	00:00:17.427000
443	00:00:17.466000
444	00:00:17.506000
445	00:00:17.545000
446	00:00:17.585000
447	00:00:17.624000
448	00:00:17.664000
449	00:00:17.703000
450	00:00:17.743000
451	00:00:17.782000
452	00:00:17.822000
453	00:00:17.862000
454	00:00:17.901000
455	00:00:17.941000
456	00:00:17.980000
457	00:00:18.020000
458	00:00:18.059000
459	00:00:18.098000
460	00:00:18.138000
461	00:00:18.178000
462	00:00:18.217000
463	00:00:18.257000
464	00:00:18.296000
465	00:00:18.336000
466	00:00:18.375000
467	00:00:18.415000
468	00:00:18.454000
469	00:00:18.494000
470	00:00:18.533000
471	00:00:18.573000
472	00:00:18.612000
473	00:00:18.652000
474	00:00:18.691000
475	00:00:18.731000
476	00:00:18.770000
477	00:00:18.810000
478	00:00:18.849000
479	00:00:18.889000
480	00:00:18.928000
481	00:00:18.968000
482	00:00:19.007000
483	00:00:19.047000
484	00:00:19.086000
485	00:00:19.126000
486	00:00:19.165000
487	00:00:19.205000
488	00:00:19.244000
489	00:00:19.284000
490	00:00:19.323000
491	00:00:19.363000
492	00:00:19.402000
493	00:00:19.442000
494	00:00:19.481000
495	00:00:19.521000
496	00:00:19.560000
497	00:00:19.600000
498	00:00:19.640000
499	00:00:19.679000
500	00:00:19.719000
501	00:00:19.758000
502	00:00:19.798000
503	00:00:19.837000
504	00:00:19.877000
505	00:00:19.916000
506	00:00:19.956000
507	00:00:19.995000
508	00:00:20.035000
509	00:00:20.074000
510	00:00:20.114000
511	00:00:20.153000
512	00:00:20.193000
513	00:00:20.232000
514	00:00:20.272000
515	00:00:20.311000
516	00:00:20.351000
517	00:00:20.390000
518	00:00:20.430000
519	00:00:20.469000
520	00:00:20.509000
521	00:00:20.548000
522	00:00:20.588000
523	00:00:20.627000
524	00:00:20.667000
525	00:00:20.706000
526	00:00:20.746000
527	00:00:20.785000
528	00:00:20.825000
529	00:00:20.864000
530	00:00:20.904000
531	00:00:20.943000
532	00:00:20.983000
533	00:00:21.022000
534	00:00:21.062000
535	00:00:21.101000
536	00:00:21.141000
537	00:00:21.181000
538	00:00:21.220000
539	00:00:21.260000
540	00:00:21.299000
541	00:00:21.339000
542	00:00:21.378000
543	00:00:21.418000
544	00:00:21.457000
545	00:00:21.497000
546	00:00:21.536000
547	00:00:21.576000
548	00:00:21.615000
549	00:00:21.655000
550	00:00:21.694000
551	00:00:21.734000
552	00:00:21.773000
553	00:00:21.813000
554	00:00:21.852000
555	00:00:21.892000
556	00:00:21.931000
557	00:00:21.971000
558	00:00:22.010000
559	00:00:22.050000
560	00:00:22.089000
561	00:00:22.129000
562	00:00:22.168000
563	00:00:22.208000
564	00:00:22.247000
565	00:00:22.287000
566	00:00:22.326000
567	00:00:22.366000
568	00:00:22.405000
569	00:00:22.445000
570	00:00:22.484000
571	00:00:22.524000
572	00:00:22.563000
573	00:00:22.603000
574	00:00:22.642000
575	00:00:22.682000
576	00:00:22.722000
577	00:00:22.761000
578	00:00:22.801000
579	00:00:22.840000
580	00:00:22.880000
581	00:00:22.919000
582	00:00:22.959000
583	00:00:22.998000
584	00:00:23.038000
585	00:00:23.077000
586	00:00:23.117000
587	00:00:23.156000
588	00:00:23.196000
589	00:00:23.235000
590	00:00:23.275000
591	00:00:23.314000
592	00:00:23.354000
593	00:00:23.393000
594	00:00:23.433000
595	00:00:23.472000
596	00:00:23.512000
597	00:00:23.551000
598	00:00:23.591000
599	00:00:23.630000
600	00:00:23.670000
601	00:00:23.709000
602	00:00:23.749000
603	00:00:23.788000
604	00:00:23.828000
605	00:00:23.867000
606	00:00:23.907000
607	00:00:23.946000
608	00:00:23.986000
609	00:00:24.025000
610	00:00:24.065000
611	00:00:24.104000
612	00:00:24.144000
613	00:00:24.183000
614	00:00:24.223000
615	00:00:24.262000
616	00:00:24.302000
617	00:00:24.341000
618	00:00:24.381000
619	00:00:24.420000
620	00:00:24.460000
621	00:00:24.500000
622	00:00:24.539000
623	00:00:24.579000
624	00:00:24.618000
625	00:00:24.658000
626	00:00:24.697000
627	00:00:24.737000
628	00:00:24.776000
629	00:00:24.816000
630	00:00:24.855000
631	00:00:24.895000
632	00:00:24.934000
633	00:00:24.974000
634	00:00:25.013000
635	00:00:25.053000
636	00:00:25.092000
637	00:00:25.132000
638	00:00:25.171000
639	00:00:25.211000
640	00:00:25.250000
641	00:00:25.291000
642	00:00:25.330000
643	00:00:25.370000
644	00:00:25.409000
645	00:00:25.449000
646	00:00:25.488000
647	00:00:25.528000
648	00:00:25.567000
649	00:00:25.607000
650	00:00:25.646000
651	00:00:25.686000
652	00:00:25.725000
653	00:00:25.765000
654	00:00:25.804000
655	00:00:25.844000
656	00:00:25.883000
657	00:00:25.923000
658	00:00:25.963000
659	00:00:26.002000
660	00:00:26.042000
661	00:00:26.081000
662	00:00:26.121000
663	00:00:26.160000
664	00:00:26.200000
665	00:00:26.239000
666	00:00:26.279000
667	00:00:26.318000
668	00:00:26.358000
669	00:00:26.397000
670	00:00:26.437000
671	00:00:26.476000
672	00:00:26.516000
673	00:00:26.555000
674	00:00:26.595000
675	00:00:26.634000
676	00:00:26.674000
677	00:00:26.713000
678	00:00:26.753000
679	00:00:26.792000
680	00:00:26.832000
681	00:00:26.871000
682	00:00:26.911000
683	00:00:26.950000
684	00:00:26.990000
685	00:00:27.029000
686	00:00:27.069000
687	00:00:27.108000
688	00:00:27.148000
689	00:00:27.187000
690	00:00:27.227000
691	00:00:27.266000
692	00:00:27.306000
693	00:00:27.345000
694	00:00:27.385000
695	00:00:27.424000
696	00:00:27.464000
697	00:00:27.504000
698	00:00:27.543000
699	00:00:27.583000
700	00:00:27.622000
701	00:00:27.662000
702	00:00:27.701000
703	00:00:27.740000
704	00:00:27.780000
705	00:00:27.820000
706	00:00:27.859000
707	00:00:27.899000
708	00:00:27.938000
709	00:00:27.978000
710	00:00:28.017000
711	00:00:28.057000
712	00:00:28.096000
713	00:00:28.136000
714	00:00:28.175000
715	00:00:28.215000
716	00:00:28.254000
717	00:00:28.294000
718	00:00:28.333000
719	00:00:28.373000
720	00:00:28.412000
721	00:00:28.452000
722	00:00:28.491000
723	00:00:28.531000
724	00:00:28.570000
725	00:00:28.610000
726	00:00:28.649000
727	00:00:28.689000
728	00:00:28.728000
729	00:00:28.768000
730	00:00:28.807000
731	00:00:28.847000
732	00:00:28.886000
733	00:00:28.926000
734	00:00:28.965000
735	00:00:29.005000
736	00:00:29.045000
737	00:00:29.084000
738	00:00:29.123000
739	00:00:29.163000
740	00:00:29.202000
741	00:00:29.242000
742	00:00:29.282000
743	00:00:29.321000
744	00:00:29.361000
745	00:00:29.400000
746	00:00:29.440000
747	00:00:29.479000
748	00:00:29.519000
749	00:00:29.558000
750	00:00:29.598000
751	00:00:29.637000
752	00:00:29.677000
753	00:00:29.716000
754	00:00:29.756000
755	00:00:29.795000
756	00:00:29.835000
757	00:00:29.874000
758	00:00:29.914000
759	00:00:29.953000
760	00:00:29.993000
761	00:00:30.032000
762	00:00:30.072000
763	00:00:30.111000
764	00:00:30.151000
765	00:00:30.190000
766	00:00:30.230000
767	00:00:30.269000
768	00:00:30.309000
769	00:00:30.348000
770	00:00:30.388000
771	00:00:30.427000
772	00:00:30.467000
773	00:00:30.506000
774	00:00:30.546000
775	00:00:30.585000
776	00:00:30.625000
777	00:00:30.664000
778	00:00:30.704000
779	00:00:30.743000
780	00:00:30.783000
781	00:00:30.823000
782	00:00:30.862000
783	00:00:30.902000
784	00:00:30.941000
785	00:00:30.981000
786	00:00:31.020000
787	00:00:31.060000
788	00:00:31.099000
789	00:00:31.139000
790	00:00:31.178000
791	00:00:31.218000
792	00:00:31.257000
793	00:00:31.297000
794	00:00:31.336000
795	00:00:31.376000
796	00:00:31.415000
797	00:00:31.455000
798	00:00:31.494000
799	00:00:31.534000
800	00:00:31.573000
801	00:00:31.613000
802	00:00:31.652000
803	00:00:31.692000
804	00:00:31.731000
805	00:00:31.771000
806	00:00:31.810000
807	00:00:31.850000
808	00:00:31.889000
809	00:00:31.929000
810	00:00:31.968000
811	00:00:32.008000
812	00:00:32.047000
813	00:00:32.087000
814	00:00:32.126000
815	00:00:32.166000
816	00:00:32.205000
817	00:00:32.245000
818	00:00:32.284000
819	00:00:32.324000
820	00:00:32.364000
821	00:00:32.403000
822	00:00:32.443000
823	00:00:32.482000
824	00:00:32.522000
825	00:00:32.561000
826	00:00:32.601000
827	00:00:32.640000
828	00:00:32.680000
829	00:00:32.719000
830	00:00:32.759000
831	00:00:32.798000
832	00:00:32.838000
833	00:00:32.877000
834	00:00:32.917000
835	00:00:32.956000
836	00:00:32.996000
837	00:00:33.035000
838	00:00:33.075000
839	00:00:33.114000
840	00:00:33.154000
841	00:00:33.193000
842	00:00:33.233000
843	00:00:33.272000
844	00:00:33.312000
845	00:00:33.351000
846	00:00:33.391000
847	00:00:33.430000
848	00:00:33.470000
849	00:00:33.509000
850	00:00:33.549000
851	00:00:33.588000
852	00:00:33.628000
853	00:00:33.667000
854	00:00:33.707000
855	00:00:33.746000
856	00:00:33.786000
857	00:00:33.826000
858	00:00:33.865000
859	00:00:33.905000
860	00:00:33.944000
861	00:00:33.983000
862	00:00:34.023000
863	00:00:34.062000
864	00:00:34.102000
865	00:00:34.142000
866	00:00:34.181000
867	00:00:34.221000
868	00:00:34.260000
869	00:00:34.300000
870	00:00:34.339000
871	00:00:34.379000
872	00:00:34.418000
873	00:00:34.458000
874	00:00:34.497000
875	00:00:34.537000
876	00:00:34.576000
877	00:00:34.616000
878	00:00:34.655000
879	00:00:34.695000
880	00:00:34.734000
881	00:00:34.774000
882	00:00:34.813000
883	00:00:34.853000
884	00:00:34.892000
885	00:00:34.932000
886	00:00:34.971000
887	00:00:35.011000
888	00:00:35.050000
889	00:00:35.090000
890	00:00:35.129000
891	00:00:35.169000
892	00:00:35.208000
893	00:00:35.248000
894	00:00:35.288000
895	00:00:35.328000
896	00:00:35.367000
897	00:00:35.407000
898	00:00:35.446000
899	00:00:35.486000
900	00:00:35.525000
901	00:00:35.565000
902	00:00:35.605000
903	00:00:35.644000
904	00:00:35.684000
905	00:00:35.723000
906	00:00:35.763000
907	00:00:35.802000
908	00:00:35.842000
909	00:00:35.881000
910	00:00:35.921000
911	00:00:35.960000
912	00:00:36
913	00:00:36.039000
914	00:00:36.079000
915	00:00:36.118000
916	00:00:36.158000
917	00:00:36.197000
918	00:00:36.237000
919	00:00:36.276000
920	00:00:36.316000
921	00:00:36.355000
922	00:00:36.395000
923	00:00:36.434000
924	00:00:36.474000
925	00:00:36.513000
926	00:00:36.553000
927	00:00:36.592000
928	00:00:36.632000
929	00:00:36.671000
930	00:00:36.711000
931	00:00:36.750000
932	00:00:36.790000
933	00:00:36.829000
934	00:00:36.869000
935	00:00:36.908000
936	00:00:36.948000
937	00:00:36.987000
938	00:00:37.027000
939	00:00:37.066000
940	00:00:37.106000
941	00:00:37.146000
942	00:00:37.185000
943	00:00:37.225000
944	00:00:37.264000
945	00:00:37.304000
946	00:00:37.343000
947	00:00:37.383000
948	00:00:37.422000
949	00:00:37.462000
950	00:00:37.501000
951	00:00:37.541000
952	00:00:37.580000
953	00:00:37.620000
954	00:00:37.659000
955	00:00:37.699000
956	00:00:37.738000
957	00:00:37.778000
958	00:00:37.817000
959	00:00:37.857000
960	00:00:37.896000
961	00:00:37.936000
962	00:00:37.975000
963	00:00:38.015000
964	00:00:38.054000
965	00:00:38.094000
966	00:00:38.133000
967	00:00:38.173000
968	00:00:38.212000
969	00:00:38.252000
970	00:00:38.291000
971	00:00:38.331000
972	00:00:38.370000
973	00:00:38.410000
974	00:00:38.449000
975	00:00:38.489000
976	00:00:38.528000
977	00:00:38.568000
978	00:00:38.607000
979	00:00:38.647000
980	00:00:38.686000
981	00:00:38.726000
982	00:00:38.765000
983	00:00:38.805000
984	00:00:38.844000
985	00:00:38.884000
986	00:00:38.924000
987	00:00:38.963000
988	00:00:39.003000
989	00:00:39.042000
990	00:00:39.082000
991	00:00:39.121000
992	00:00:39.161000
993	00:00:39.200000
994	00:00:39.240000
995	00:00:39.279000
996	00:00:39.319000
997	00:00:39.358000
998	00:00:39.398000
999	00:00:39.437000
1000	00:00:39.477000
1001	00:00:39.516000
1002	00:00:39.556000
1003	00:00:39.595000
1004	00:00:39.635000
1005	00:00:39.674000
1006	00:00:39.714000
1007	00:00:39.753000
1008	00:00:39.793000
1009	00:00:39.832000
1010	00:00:39.872000
1011	00:00:39.911000
1012	00:00:39.951000
1013	00:00:39.990000
1014	00:00:40.030000
1015	00:00:40.069000
1016	00:00:40.109000
1017	00:00:40.148000
1018	00:00:40.188000
1019	00:00:40.227000
1020	00:00:40.267000
1021	00:00:40.306000
1022	00:00:40.346000
1023	00:00:40.385000
1024	00:00:40.425000
1025	00:00:40.465000
1026	00:00:40.504000
1027	00:00:40.544000
1028	00:00:40.583000
1029	00:00:40.623000
1030	00:00:40.662000
1031	00:00:40.702000
1032	00:00:40.741000
1033	00:00:40.781000
1034	00:00:40.820000
1035	00:00:40.860000
1036	00:00:40.899000
1037	00:00:40.939000
1038	00:00:40.978000
1039	00:00:41.018000
1040	00:00:41.057000
1041	00:00:41.097000
1042	00:00:41.136000
1043	00:00:41.176000
1044	00:00:41.215000
1045	00:00:41.255000
1046	00:00:41.294000
1047	00:00:41.334000
1048	00:00:41.373000
1049	00:00:41.413000
1050	00:00:41.452000
1051	00:00:41.492000
1052	00:00:41.531000
1053	00:00:41.571000
1054	00:00:41.610000
1055	00:00:41.650000
1056	00:00:41.689000
1057	00:00:41.729000
1058	00:00:41.768000
1059	00:00:41.808000
1060	00:00:41.847000
1061	00:00:41.887000
1062	00:00:41.926000
1063	00:00:41.966000
1064	00:00:42.006000
1065	00:00:42.045000
1066	00:00:42.085000
1067	00:00:42.124000
1068	00:00:42.164000
1069	00:00:42.203000
1070	00:00:42.243000
1071	00:00:42.282000
1072	00:00:42.322000
1073	00:00:42.361000
1074	00:00:42.401000
1075	00:00:42.440000
1076	00:00:42.480000
1077	00:00:42.519000
1078	00:00:42.559000
1079	00:00:42.598000
1080	00:00:42.638000
1081	00:00:42.677000
1082	00:00:42.717000
1083	00:00:42.756000
1084	00:00:42.796000
1085	00:00:42.835000
1086	00:00:42.875000
1087	00:00:42.914000
1088	00:00:42.954000
1089	00:00:42.993000
1090	00:00:43.033000
1091	00:00:43.072000
1092	00:00:43.112000
1093	00:00:43.151000
1094	00:00:43.191000
1095	00:00:43.230000
1096	00:00:43.270000
1097	00:00:43.309000
1098	00:00:43.349000
1099	00:00:43.388000
1100	00:00:43.428000
1101	00:00:43.468000
1102	00:00:43.507000
1103	00:00:43.547000
1104	00:00:43.586000
1105	00:00:43.625000
1106	00:00:43.665000
1107	00:00:43.704000
1108	00:00:43.744000
1109	00:00:43.784000
1110	00:00:43.823000
1111	00:00:43.863000
1112	00:00:43.902000
1113	00:00:43.942000
1114	00:00:43.981000
1115	00:00:44.021000
1116	00:00:44.060000
1117	00:00:44.100000
1118	00:00:44.139000
1119	00:00:44.179000
1120	00:00:44.218000
1121	00:00:44.258000
1122	00:00:44.297000
1123	00:00:44.337000
1124	00:00:44.376000
1125	00:00:44.416000
1126	00:00:44.455000
1127	00:00:44.495000
1128	00:00:44.534000
1129	00:00:44.574000
1130	00:00:44.613000
1131	00:00:44.653000
1132	00:00:44.692000
1133	00:00:44.732000
1134	00:00:44.771000
1135	00:00:44.811000
1136	00:00:44.850000
1137	00:00:44.890000
1138	00:00:44.929000
1139	00:00:44.969000
1140	00:00:45.008000
1141	00:00:45.048000
1142	00:00:45.087000
1143	00:00:45.127000
1144	00:00:45.166000
1145	00:00:45.206000
1146	00:00:45.245000
1147	00:00:45.286000
1148	00:00:45.326000
1149	00:00:45.365000
1150	00:00:45.405000
1151	00:00:45.444000
1152	00:00:45.484000
1153	00:00:45.523000
1154	00:00:45.563000
1155	00:00:45.602000
1156	00:00:45.642000
1157	00:00:45.681000
1158	00:00:45.721000
1159	00:00:45.760000
1160	00:00:45.800000
1161	00:00:45.839000
1162	00:00:45.879000
1163	00:00:45.918000
1164	00:00:45.958000
1165	00:00:45.997000
1166	00:00:46.037000
1167	00:00:46.076000
1168	00:00:46.116000
1169	00:00:46.155000
1170	00:00:46.195000
1171	00:00:46.234000
1172	00:00:46.274000
1173	00:00:46.313000
1174	00:00:46.353000
1175	00:00:46.392000
1176	00:00:46.432000
1177	00:00:46.471000
1178	00:00:46.511000
1179	00:00:46.550000
1180	00:00:46.590000
1181	00:00:46.629000
1182	00:00:46.669000
1183	00:00:46.708000
1184	00:00:46.748000
1185	00:00:46.788000
1186	00:00:46.827000
1187	00:00:46.867000
1188	00:00:46.906000
1189	00:00:46.946000
1190	00:00:46.985000
1191	00:00:47.025000
1192	00:00:47.064000
1193	00:00:47.104000
1194	00:00:47.143000
1195	00:00:47.183000
1196	00:00:47.222000
1197	00:00:47.262000
1198	00:00:47.301000
1199	00:00:47.341000
1200	00:00:47.380000
1201	00:00:47.420000
1202	00:00:47.459000
1203	00:00:47.499000
1204	00:00:47.538000
1205	00:00:47.578000
1206	00:00:47.617000
1207	00:00:47.657000
1208	00:00:47.696000
1209	00:00:47.736000
1210	00:00:47.775000
1211	00:00:47.815000
1212	00:00:47.854000
1213	00:00:47.894000
1214	00:00:47.933000
1215	00:00:47.973000
1216	00:00:48.012000
1217	00:00:48.052000
1218	00:00:48.091000
1219	00:00:48.131000
1220	00:00:48.170000
1221	00:00:48.210000
1222	00:00:48.249000
1223	00:00:48.289000
1224	00:00:48.328000
1225	00:00:48.368000
1226	00:00:48.407000
1227	00:00:48.447000
1228	00:00:48.486000
1229	00:00:48.526000
1230	00:00:48.566000
1231	00:00:48.605000
1232	00:00:48.645000
1233	00:00:48.684000
1234	00:00:48.724000
1235	00:00:48.763000
1236	00:00:48.803000
1237	00:00:48.842000
1238	00:00:48.882000
1239	00:00:48.921000
1240	00:00:48.961000
1241	00:00:49
1242	00:00:49.040000
1243	00:00:49.079000
1244	00:00:49.119000
1245	00:00:49.158000
1246	00:00:49.198000
1247	00:00:49.237000
1248	00:00:49.277000
1249	00:00:49.316000
1250	00:00:49.356000
1251	00:00:49.395000
1252	00:00:49.435000
1253	00:00:49.474000
1254	00:00:49.514000
1255	00:00:49.553000
1256	00:00:49.593000
1257	00:00:49.632000
1258	00:00:49.672000
1259	00:00:49.711000
1260	00:00:49.751000
1261	00:00:49.790000
1262	00:00:49.830000
1263	00:00:49.869000
1264	00:00:49.909000
1265	00:00:49.948000
1266	00:00:49.988000
1267	00:00:50.027000
1268	00:00:50.067000
1269	00:00:50.107000
1270	00:00:50.146000
1271	00:00:50.186000
1272	00:00:50.225000
1273	00:00:50.265000
1274	00:00:50.304000
1275	00:00:50.344000
1276	00:00:50.383000
1277	00:00:50.423000
1278	00:00:50.462000
1279	00:00:50.502000
1280	00:00:50.541000
1281	00:00:50.581000
1282	00:00:50.620000
1283	00:00:50.660000
1284	00:00:50.699000
1285	00:00:50.739000
1286	00:00:50.778000
1287	00:00:50.818000
1288	00:00:50.857000
1289	00:00:50.897000
1290	00:00:50.936000
1291	00:00:50.976000
1292	00:00:51.015000
1293	00:00:51.055000
1294	00:00:51.094000
1295	00:00:51.134000
1296	00:00:51.173000
1297	00:00:51.213000
1298	00:00:51.252000
1299	00:00:51.292000
1300	00:00:51.331000
1301	00:00:51.371000
1302	00:00:51.410000
1303	00:00:51.450000
1304	00:00:51.489000
1305	00:00:51.529000
1306	00:00:51.568000
1307	00:00:51.608000
1308	00:00:51.648000
1309	00:00:51.687000
1310	00:00:51.727000
1311	00:00:51.766000
1312	00:00:51.806000
1313	00:00:51.845000
1314	00:00:51.885000
1315	00:00:51.924000
1316	00:00:51.964000
1317	00:00:52.003000
1318	00:00:52.043000
1319	00:00:52.082000
1320	00:00:52.122000
1321	00:00:52.161000
1322	00:00:52.201000
1323	00:00:52.240000
1324	00:00:52.280000
1325	00:00:52.319000
1326	00:00:52.359000
1327	00:00:52.398000
1328	00:00:52.438000
1329	00:00:52.477000
1330	00:00:52.517000
1331	00:00:52.556000
1332	00:00:52.596000
1333	00:00:52.635000
1334	00:00:52.675000
1335	00:00:52.714000
1336	00:00:52.754000
1337	00:00:52.793000
1338	00:00:52.833000
1339	00:00:52.872000
1340	00:00:52.912000
1341	00:00:52.951000
1342	00:00:52.991000
1343	00:00:53.030000
1344	00:00:53.070000
1345	00:00:53.110000
1346	00:00:53.149000
1347	00:00:53.189000
1348	00:00:53.228000
1349	00:00:53.267000
1350	00:00:53.307000
1351	00:00:53.346000
1352	00:00:53.386000
1353	00:00:53.426000
1354	00:00:53.465000
1355	00:00:53.505000
1356	00:00:53.544000
1357	00:00:53.584000
1358	00:00:53.623000
1359	00:00:53.663000
1360	00:00:53.702000
1361	00:00:53.742000
1362	00:00:53.781000
1363	00:00:53.821000
1364	00:00:53.860000
1365	00:00:53.900000
1366	00:00:53.939000
1367	00:00:53.979000
1368	00:00:54.018000
1369	00:00:54.058000
1370	00:00:54.097000
1371	00:00:54.137000
1372	00:00:54.176000
1373	00:00:54.216000
1374	00:00:54.255000
1375	00:00:54.295000
1376	00:00:54.334000
1377	00:00:54.374000
1378	00:00:54.413000
1379	00:00:54.453000
1380	00:00:54.492000
1381	00:00:54.532000
1382	00:00:54.571000
1383	00:00:54.611000
1384	00:00:54.650000
1385	00:00:54.690000
1386	00:00:54.729000
1387	00:00:54.769000
1388	00:00:54.808000
1389	00:00:54.848000
1390	00:00:54.887000
1391	00:00:54.927000
1392	00:00:54.967000
1393	00:00:55.006000
1394	00:00:55.046000
1395	00:00:55.085000
1396	00:00:55.125000
1397	00:00:55.164000
1398	00:00:55.204000
1399	00:00:55.243000
1400	00:00:55.284000
1401	00:00:55.323000
1402	00:00:55.363000
1403	00:00:55.402000
1404	00:00:55.442000
1405	00:00:55.481000
1406	00:00:55.521000
1407	00:00:55.560000
1408	00:00:55.600000
1409	00:00:55.639000
1410	00:00:55.679000
1411	00:00:55.718000
1412	00:00:55.758000
1413	00:00:55.797000
1414	00:00:55.837000
1415	00:00:55.876000
1416	00:00:55.916000
1417	00:00:55.955000
1418	00:00:55.995000

## Sheet: #13
frame	time	PC	TB	ant isth	mid isth	post isth
490	00:00:19.321000
491	00:00:19.361000
492	00:00:19.400000
493	00:00:19.440000
494	00:00:19.479000
495	00:00:19.519000
496	00:00:19.558000
497	00:00:19.598000
498	00:00:19.637000
499	00:00:19.677000
500	00:00:19.716000
501	00:00:19.756000
502	00:00:19.795000
503	00:00:19.835000
504	00:00:19.874000
505	00:00:19.914000
506	00:00:19.953000
507	00:00:19.993000
508	00:00:20.033000
509	00:00:20.072000
510	00:00:20.112000
511	00:00:20.151000
512	00:00:20.191000
513	00:00:20.230000
514	00:00:20.270000
515	00:00:20.309000
516	00:00:20.349000
517	00:00:20.388000
518	00:00:20.428000
519	00:00:20.467000
520	00:00:20.507000
521	00:00:20.546000
522	00:00:20.586000
523	00:00:20.625000
524	00:00:20.665000
525	00:00:20.704000
526	00:00:20.744000
527	00:00:20.783000
528	00:00:20.823000
529	00:00:20.862000
530	00:00:20.902000
531	00:00:20.941000
532	00:00:20.981000
533	00:00:21.020000
534	00:00:21.060000
535	00:00:21.099000
536	00:00:21.139000
537	00:00:21.178000
538	00:00:21.218000
539	00:00:21.257000
540	00:00:21.297000
541	00:00:21.336000
542	00:00:21.376000
543	00:00:21.415000
544	00:00:21.455000
545	00:00:21.494000
546	00:00:21.534000
547	00:00:21.574000
548	00:00:21.613000
549	00:00:21.653000
550	00:00:21.692000
551	00:00:21.732000
552	00:00:21.771000
553	00:00:21.811000
554	00:00:21.850000
555	00:00:21.890000
556	00:00:21.929000
557	00:00:21.969000
558	00:00:22.008000
559	00:00:22.048000
560	00:00:22.087000
561	00:00:22.127000
562	00:00:22.166000
563	00:00:22.206000
564	00:00:22.245000
565	00:00:22.285000
566	00:00:22.324000
567	00:00:22.364000
568	00:00:22.403000
569	00:00:22.443000
570	00:00:22.482000
571	00:00:22.522000
572	00:00:22.561000
573	00:00:22.601000
574	00:00:22.640000
575	00:00:22.680000
576	00:00:22.719000
577	00:00:22.759000
578	00:00:22.798000
579	00:00:22.838000
580	00:00:22.877000
581	00:00:22.917000
582	00:00:22.956000
583	00:00:22.996000
584	00:00:23.035000
585	00:00:23.075000
586	00:00:23.115000
587	00:00:23.154000
588	00:00:23.194000
589	00:00:23.233000
590	00:00:23.272000
591	00:00:23.312000
592	00:00:23.352000
593	00:00:23.391000
594	00:00:23.431000
595	00:00:23.470000
596	00:00:23.510000
597	00:00:23.549000
598	00:00:23.589000
599	00:00:23.628000
600	00:00:23.668000
601	00:00:23.707000
602	00:00:23.747000
603	00:00:23.786000
604	00:00:23.826000
605	00:00:23.865000
606	00:00:23.905000
607	00:00:23.944000
608	00:00:23.984000
609	00:00:24.023000
610	00:00:24.063000
611	00:00:24.102000
612	00:00:24.142000
613	00:00:24.181000
614	00:00:24.221000
615	00:00:24.260000
616	00:00:24.300000
617	00:00:24.339000
618	00:00:24.379000
619	00:00:24.418000
620	00:00:24.458000
621	00:00:24.497000
622	00:00:24.537000
623	00:00:24.576000
624	00:00:24.616000
625	00:00:24.655000
626	00:00:24.695000
627	00:00:24.734000
628	00:00:24.774000
629	00:00:24.813000
630	00:00:24.853000
631	00:00:24.893000
632	00:00:24.932000
633	00:00:24.972000
634	00:00:25.011000
635	00:00:25.051000
636	00:00:25.090000
637	00:00:25.130000
638	00:00:25.169000
639	00:00:25.209000
640	00:00:25.248000
641	00:00:25.288000
642	00:00:25.327000
643	00:00:25.367000
644	00:00:25.406000
645	00:00:25.446000
646	00:00:25.485000
647	00:00:25.525000
648	00:00:25.564000
649	00:00:25.604000
650	00:00:25.643000
651	00:00:25.683000
652	00:00:25.722000
653	00:00:25.762000
654	00:00:25.801000
655	00:00:25.841000
656	00:00:25.880000
657	00:00:25.920000
658	00:00:25.959000
659	00:00:25.999000
660	00:00:26.038000
661	00:00:26.078000
662	00:00:26.117000
663	00:00:26.157000
664	00:00:26.196000
665	00:00:26.236000
666	00:00:26.275000
667	00:00:26.315000
668	00:00:26.355000
669	00:00:26.394000
670	00:00:26.434000
671	00:00:26.473000
672	00:00:26.513000
673	00:00:26.552000
674	00:00:26.592000
675	00:00:26.631000
676	00:00:26.671000
677	00:00:26.710000
678	00:00:26.750000
679	00:00:26.789000
680	00:00:26.829000
681	00:00:26.868000
682	00:00:26.908000
683	00:00:26.947000
684	00:00:26.987000
685	00:00:27.026000
686	00:00:27.066000
687	00:00:27.105000
688	00:00:27.145000
689	00:00:27.184000
690	00:00:27.224000
691	00:00:27.263000
692	00:00:27.303000
693	00:00:27.342000
694	00:00:27.382000
695	00:00:27.421000
696	00:00:27.461000
697	00:00:27.500000
698	00:00:27.540000
699	00:00:27.579000
700	00:00:27.619000
701	00:00:27.658000
702	00:00:27.698000
703	00:00:27.737000
704	00:00:27.777000
705	00:00:27.816000
706	00:00:27.856000
707	00:00:27.896000
708	00:00:27.935000
709	00:00:27.975000
710	00:00:28.014000
711	00:00:28.054000
712	00:00:28.093000
713	00:00:28.133000
714	00:00:28.172000
715	00:00:28.212000
716	00:00:28.251000
717	00:00:28.291000
718	00:00:28.330000
719	00:00:28.370000
720	00:00:28.409000
721	00:00:28.449000
722	00:00:28.488000
723	00:00:28.528000
724	00:00:28.567000
725	00:00:28.607000
726	00:00:28.646000
727	00:00:28.686000
728	00:00:28.725000
729	00:00:28.765000
730	00:00:28.804000
731	00:00:28.844000
732	00:00:28.883000
733	00:00:28.923000
734	00:00:28.962000
735	00:00:29.002000
736	00:00:29.041000
737	00:00:29.081000
738	00:00:29.120000
739	00:00:29.160000
740	00:00:29.199000
741	00:00:29.239000
742	00:00:29.278000
743	00:00:29.318000
744	00:00:29.357000
745	00:00:29.397000
746	00:00:29.436000
747	00:00:29.476000
748	00:00:29.515000
749	00:00:29.555000
750	00:00:29.594000
751	00:00:29.634000
752	00:00:29.674000
753	00:00:29.713000
754	00:00:29.753000
755	00:00:29.792000
756	00:00:29.832000
757	00:00:29.871000
758	00:00:29.911000
759	00:00:29.950000
760	00:00:29.990000
761	00:00:30.029000
762	00:00:30.069000
763	00:00:30.108000
764	00:00:30.148000
765	00:00:30.187000
766	00:00:30.227000
767	00:00:30.266000
768	00:00:30.306000
769	00:00:30.345000
770	00:00:30.385000
771	00:00:30.424000
772	00:00:30.464000
773	00:00:30.503000
774	00:00:30.543000
775	00:00:30.582000
776	00:00:30.622000
777	00:00:30.661000
778	00:00:30.701000
779	00:00:30.740000
780	00:00:30.780000
781	00:00:30.819000
782	00:00:30.859000
783	00:00:30.898000
784	00:00:30.938000
785	00:00:30.977000
786	00:00:31.017000
787	00:00:31.056000
788	00:00:31.096000
789	00:00:31.135000
790	00:00:31.175000
791	00:00:31.215000
792	00:00:31.254000
793	00:00:31.294000
794	00:00:31.333000
795	00:00:31.373000
796	00:00:31.412000
797	00:00:31.452000
798	00:00:31.491000
799	00:00:31.531000
800	00:00:31.570000
801	00:00:31.610000
802	00:00:31.649000
803	00:00:31.689000
804	00:00:31.728000
805	00:00:31.768000
806	00:00:31.807000
807	00:00:31.847000
808	00:00:31.886000
809	00:00:31.926000
810	00:00:31.965000
811	00:00:32.005000
812	00:00:32.044000
813	00:00:32.084000
814	00:00:32.123000
815	00:00:32.163000
816	00:00:32.202000
817	00:00:32.242000
818	00:00:32.281000
819	00:00:32.321000
820	00:00:32.360000
821	00:00:32.400000
822	00:00:32.439000
823	00:00:32.479000
824	00:00:32.518000
825	00:00:32.558000
826	00:00:32.597000
827	00:00:32.637000
828	00:00:32.676000
829	00:00:32.716000
830	00:00:32.756000
831	00:00:32.795000
832	00:00:32.835000
833	00:00:32.874000
834	00:00:32.913000
835	00:00:32.953000
836	00:00:32.993000
837	00:00:33.032000
838	00:00:33.072000
839	00:00:33.111000
840	00:00:33.151000
841	00:00:33.190000
842	00:00:33.230000
843	00:00:33.269000
844	00:00:33.309000
845	00:00:33.348000
846	00:00:33.388000
847	00:00:33.427000
848	00:00:33.467000
849	00:00:33.506000
850	00:00:33.546000
851	00:00:33.585000
852	00:00:33.625000
853	00:00:33.664000
854	00:00:33.704000
855	00:00:33.743000
856	00:00:33.783000
857	00:00:33.822000
858	00:00:33.862000
859	00:00:33.901000
860	00:00:33.941000
861	00:00:33.980000
862	00:00:34.020000
863	00:00:34.059000
864	00:00:34.099000
865	00:00:34.138000
866	00:00:34.178000
867	00:00:34.217000
868	00:00:34.257000
869	00:00:34.296000
870	00:00:34.336000
871	00:00:34.375000
872	00:00:34.415000
873	00:00:34.454000
874	00:00:34.494000
875	00:00:34.534000
876	00:00:34.573000
877	00:00:34.613000
878	00:00:34.652000
879	00:00:34.692000
880	00:00:34.731000
881	00:00:34.771000
882	00:00:34.810000
883	00:00:34.850000
884	00:00:34.889000
885	00:00:34.929000
886	00:00:34.968000
887	00:00:35.008000
888	00:00:35.047000
889	00:00:35.087000
890	00:00:35.126000
891	00:00:35.166000
892	00:00:35.205000
893	00:00:35.245000
894	00:00:35.284000
895	00:00:35.324000
896	00:00:35.363000
897	00:00:35.403000
898	00:00:35.442000
899	00:00:35.482000
900	00:00:35.521000
901	00:00:35.561000
902	00:00:35.600000
903	00:00:35.640000
904	00:00:35.679000
905	00:00:35.719000
906	00:00:35.758000
907	00:00:35.798000
908	00:00:35.837000
909	00:00:35.877000
910	00:00:35.916000
911	00:00:35.956000
912	00:00:35.995000
913	00:00:36.035000
914	00:00:36.075000
915	00:00:36.114000
916	00:00:36.154000
917	00:00:36.193000
918	00:00:36.233000
919	00:00:36.272000
920	00:00:36.312000
921	00:00:36.351000
922	00:00:36.391000
923	00:00:36.430000
924	00:00:36.470000
925	00:00:36.509000
926	00:00:36.549000
927	00:00:36.588000
928	00:00:36.628000
929	00:00:36.667000
930	00:00:36.707000
931	00:00:36.746000
932	00:00:36.786000
933	00:00:36.825000
934	00:00:36.865000
935	00:00:36.904000
936	00:00:36.944000
937	00:00:36.983000
938	00:00:37.023000
939	00:00:37.062000
940	00:00:37.102000
941	00:00:37.141000
942	00:00:37.181000
943	00:00:37.220000
944	00:00:37.260000
945	00:00:37.299000
946	00:00:37.339000
947	00:00:37.378000
948	00:00:37.418000
949	00:00:37.457000
950	00:00:37.497000
951	00:00:37.537000
952	00:00:37.576000
953	00:00:37.616000
954	00:00:37.655000
955	00:00:37.695000
956	00:00:37.734000
957	00:00:37.774000
958	00:00:37.813000
959	00:00:37.853000
960	00:00:37.892000
961	00:00:37.932000
962	00:00:37.971000
963	00:00:38.011000
964	00:00:38.050000
965	00:00:38.090000
966	00:00:38.129000
967	00:00:38.169000
968	00:00:38.208000
969	00:00:38.248000
970	00:00:38.287000
971	00:00:38.327000
972	00:00:38.366000
973	00:00:38.406000
974	00:00:38.445000
975	00:00:38.485000
976	00:00:38.524000
977	00:00:38.564000
978	00:00:38.603000
979	00:00:38.643000
980	00:00:38.682000
981	00:00:38.722000
982	00:00:38.761000
983	00:00:38.801000
984	00:00:38.840000
985	00:00:38.880000
986	00:00:38.919000
987	00:00:38.959000
988	00:00:38.998000
989	00:00:39.038000
990	00:00:39.077000
991	00:00:39.117000
992	00:00:39.156000
993	00:00:39.196000
994	00:00:39.235000
995	00:00:39.275000
996	00:00:39.315000
997	00:00:39.354000
998	00:00:39.394000
999	00:00:39.433000
1000	00:00:39.473000
1001	00:00:39.512000
1002	00:00:39.552000
1003	00:00:39.591000
1004	00:00:39.631000
1005	00:00:39.670000
1006	00:00:39.710000
1007	00:00:39.749000
1008	00:00:39.789000
1009	00:00:39.828000
1010	00:00:39.868000
1011	00:00:39.907000
1012	00:00:39.947000
1013	00:00:39.986000
1014	00:00:40.026000
1015	00:00:40.065000
1016	00:00:40.105000
1017	00:00:40.144000
1018	00:00:40.184000
1019	00:00:40.223000
1020	00:00:40.263000
1021	00:00:40.302000
1022	00:00:40.342000
1023	00:00:40.381000
1024	00:00:40.421000
1025	00:00:40.460000
1026	00:00:40.500000
1027	00:00:40.539000
1028	00:00:40.579000
1029	00:00:40.618000
1030	00:00:40.658000
1031	00:00:40.697000
1032	00:00:40.737000
1033	00:00:40.776000
1034	00:00:40.816000
1035	00:00:40.856000
1036	00:00:40.895000
1037	00:00:40.935000
1038	00:00:40.974000
1039	00:00:41.014000
1040	00:00:41.053000
1041	00:00:41.093000
1042	00:00:41.132000
1043	00:00:41.172000
1044	00:00:41.211000
1045	00:00:41.251000
1046	00:00:41.290000
1047	00:00:41.330000
1048	00:00:41.369000
1049	00:00:41.409000
1050	00:00:41.448000
1051	00:00:41.488000
1052	00:00:41.527000
1053	00:00:41.567000
1054	00:00:41.606000
1055	00:00:41.646000
1056	00:00:41.685000
1057	00:00:41.725000
1058	00:00:41.764000
1059	00:00:41.804000
1060	00:00:41.843000
1061	00:00:41.883000
1062	00:00:41.922000
1063	00:00:41.962000
1064	00:00:42.001000
1065	00:00:42.041000
1066	00:00:42.080000
1067	00:00:42.120000
1068	00:00:42.159000
1069	00:00:42.199000
1070	00:00:42.238000
1071	00:00:42.278000
1072	00:00:42.317000
1073	00:00:42.357000
1074	00:00:42.397000
1075	00:00:42.436000
1076	00:00:42.476000
1077	00:00:42.515000
1078	00:00:42.554000
1079	00:00:42.594000
1080	00:00:42.634000
1081	00:00:42.673000
1082	00:00:42.713000
1083	00:00:42.752000
1084	00:00:42.792000
1085	00:00:42.831000
1086	00:00:42.871000
1087	00:00:42.910000
1088	00:00:42.950000
1089	00:00:42.989000
1090	00:00:43.029000
1091	00:00:43.068000
1092	00:00:43.108000
1093	00:00:43.147000
1094	00:00:43.187000
1095	00:00:43.226000
1096	00:00:43.266000
1097	00:00:43.305000
1098	00:00:43.345000
1099	00:00:43.384000
1100	00:00:43.424000
1101	00:00:43.463000
1102	00:00:43.503000
1103	00:00:43.542000
1104	00:00:43.582000
1105	00:00:43.621000
1106	00:00:43.661000
1107	00:00:43.700000
1108	00:00:43.740000
1109	00:00:43.779000
1110	00:00:43.819000
1111	00:00:43.858000
1112	00:00:43.898000
1113	00:00:43.937000
1114	00:00:43.977000
1115	00:00:44.016000
1116	00:00:44.056000
1117	00:00:44.095000
1118	00:00:44.135000
1119	00:00:44.175000
1120	00:00:44.214000
1121	00:00:44.254000
1122	00:00:44.293000
1123	00:00:44.333000
1124	00:00:44.372000
1125	00:00:44.412000
1126	00:00:44.451000
1127	00:00:44.491000
1128	00:00:44.530000
1129	00:00:44.570000
1130	00:00:44.609000
1131	00:00:44.649000
1132	00:00:44.688000
1133	00:00:44.728000
1134	00:00:44.767000
1135	00:00:44.807000
1136	00:00:44.846000
1137	00:00:44.886000
1138	00:00:44.925000
1139	00:00:44.965000
1140	00:00:45.004000
1141	00:00:45.044000
1142	00:00:45.083000
1143	00:00:45.123000
1144	00:00:45.162000
1145	00:00:45.202000
1146	00:00:45.241000
1147	00:00:45.281000
1148	00:00:45.320000
1149	00:00:45.360000
1150	00:00:45.399000
1151	00:00:45.439000
1152	00:00:45.478000
1153	00:00:45.518000
1154	00:00:45.557000
1155	00:00:45.597000
1156	00:00:45.636000
1157	00:00:45.676000
1158	00:00:45.716000
1159	00:00:45.755000
1160	00:00:45.795000
1161	00:00:45.834000
1162	00:00:45.874000
1163	00:00:45.913000
1164	00:00:45.953000
1165	00:00:45.992000
1166	00:00:46.032000
1167	00:00:46.071000
1168	00:00:46.111000
1169	00:00:46.150000
1170	00:00:46.190000
1171	00:00:46.229000
1172	00:00:46.269000
1173	00:00:46.308000
1174	00:00:46.348000
1175	00:00:46.387000
1176	00:00:46.427000
1177	00:00:46.466000
1178	00:00:46.506000
1179	00:00:46.545000
1180	00:00:46.585000
1181	00:00:46.624000
1182	00:00:46.664000
1183	00:00:46.703000
1184	00:00:46.743000
1185	00:00:46.782000
1186	00:00:46.822000
1187	00:00:46.861000
1188	00:00:46.901000
1189	00:00:46.940000
1190	00:00:46.980000
1191	00:00:47.019000
1192	00:00:47.059000
1193	00:00:47.098000
1194	00:00:47.138000
1195	00:00:47.178000
1196	00:00:47.217000
1197	00:00:47.257000
1198	00:00:47.296000
1199	00:00:47.336000
1200	00:00:47.375000
1201	00:00:47.414000
1202	00:00:47.454000
1203	00:00:47.494000
1204	00:00:47.533000
1205	00:00:47.573000
1206	00:00:47.612000
1207	00:00:47.652000
1208	00:00:47.691000
1209	00:00:47.731000
1210	00:00:47.770000
1211	00:00:47.810000
1212	00:00:47.849000
1213	00:00:47.889000
1214	00:00:47.928000
1215	00:00:47.968000
1216	00:00:48.007000
1217	00:00:48.047000
1218	00:00:48.086000
1219	00:00:48.126000
1220	00:00:48.165000
1221	00:00:48.205000
1222	00:00:48.244000
1223	00:00:48.284000
1224	00:00:48.323000
1225	00:00:48.363000
1226	00:00:48.402000
1227	00:00:48.442000
1228	00:00:48.481000
1229	00:00:48.521000
1230	00:00:48.560000
1231	00:00:48.600000
1232	00:00:48.639000
1233	00:00:48.679000
1234	00:00:48.718000
1235	00:00:48.758000
1236	00:00:48.797000
1237	00:00:48.837000
1238	00:00:48.876000
1239	00:00:48.916000
1240	00:00:48.956000
1241	00:00:48.995000
1242	00:00:49.035000
1243	00:00:49.074000
1244	00:00:49.114000
1245	00:00:49.153000
1246	00:00:49.193000
1247	00:00:49.232000
1248	00:00:49.272000
1249	00:00:49.311000
1250	00:00:49.351000
1251	00:00:49.390000
1252	00:00:49.430000
1253	00:00:49.469000
1254	00:00:49.509000
1255	00:00:49.548000
1256	00:00:49.588000
1257	00:00:49.627000
1258	00:00:49.667000
1259	00:00:49.706000
1260	00:00:49.746000
1261	00:00:49.785000
1262	00:00:49.825000
1263	00:00:49.864000
1264	00:00:49.904000
1265	00:00:49.943000
1266	00:00:49.983000
1267	00:00:50.022000
1268	00:00:50.062000
1269	00:00:50.101000
1270	00:00:50.141000
1271	00:00:50.180000
1272	00:00:50.220000
1273	00:00:50.259000
1274	00:00:50.299000
1275	00:00:50.338000
1276	00:00:50.378000
1277	00:00:50.417000
1278	00:00:50.457000
1279	00:00:50.497000
1280	00:00:50.536000
1281	00:00:50.576000
1282	00:00:50.615000
1283	00:00:50.655000
1284	00:00:50.694000
1285	00:00:50.734000
1286	00:00:50.773000
1287	00:00:50.813000
1288	00:00:50.852000
1289	00:00:50.892000
1290	00:00:50.931000
1291	00:00:50.971000
1292	00:00:51.010000
1293	00:00:51.050000
1294	00:00:51.089000
1295	00:00:51.129000
1296	00:00:51.168000
1297	00:00:51.208000
1298	00:00:51.247000
1299	00:00:51.287000
1300	00:00:51.326000
1301	00:00:51.366000
1302	00:00:51.405000
1303	00:00:51.445000
1304	00:00:51.484000
1305	00:00:51.524000
1306	00:00:51.563000
1307	00:00:51.603000
1308	00:00:51.642000
1309	00:00:51.682000
1310	00:00:51.721000
1311	00:00:51.761000
1312	00:00:51.800000
1313	00:00:51.840000
1314	00:00:51.879000
1315	00:00:51.919000
1316	00:00:51.958000
1317	00:00:51.998000
1318	00:00:52.038000
1319	00:00:52.077000
1320	00:00:52.117000
1321	00:00:52.156000
1322	00:00:52.196000
1323	00:00:52.235000
1324	00:00:52.275000
1325	00:00:52.314000
1326	00:00:52.354000
1327	00:00:52.393000
1328	00:00:52.433000
1329	00:00:52.472000
1330	00:00:52.512000
1331	00:00:52.551000
1332	00:00:52.591000
1333	00:00:52.630000
1334	00:00:52.670000
1335	00:00:52.709000
1336	00:00:52.749000
1337	00:00:52.788000
1338	00:00:52.828000
1339	00:00:52.867000
1340	00:00:52.907000
1341	00:00:52.946000
1342	00:00:52.986000
1343	00:00:53.025000
1344	00:00:53.065000
1345	00:00:53.104000
1346	00:00:53.144000
1347	00:00:53.183000
1348	00:00:53.223000
1349	00:00:53.262000
1350	00:00:53.302000
1351	00:00:53.341000
1352	00:00:53.381000
1353	00:00:53.420000
1354	00:00:53.460000
1355	00:00:53.500000
1356	00:00:53.539000
1357	00:00:53.579000
1358	00:00:53.618000
1359	00:00:53.657000
1360	00:00:53.697000
1361	00:00:53.736000
1362	00:00:53.776000
1363	00:00:53.816000
1364	00:00:53.855000
1365	00:00:53.895000
1366	00:00:53.934000
1367	00:00:53.974000
1368	00:00:54.013000
1369	00:00:54.053000
1370	00:00:54.092000
1371	00:00:54.132000
1372	00:00:54.171000
1373	00:00:54.211000
1374	00:00:54.250000
1375	00:00:54.290000
1376	00:00:54.329000
1377	00:00:54.369000
1378	00:00:54.408000
1379	00:00:54.448000
1380	00:00:54.487000
1381	00:00:54.527000
1382	00:00:54.566000
1383	00:00:54.606000
1384	00:00:54.645000
1385	00:00:54.685000
1386	00:00:54.724000
1387	00:00:54.764000
1388	00:00:54.803000
1389	00:00:54.843000
1390	00:00:54.882000
1391	00:00:54.922000
1392	00:00:54.961000
1393	00:00:55.001000
1394	00:00:55.040000
1395	00:00:55.080000
1396	00:00:55.119000
1397	00:00:55.159000
1398	00:00:55.198000
1399	00:00:55.238000
1400	00:00:55.277000
1401	00:00:55.317000
1402	00:00:55.357000
1403	00:00:55.396000
1404	00:00:55.436000
1405	00:00:55.475000
1406	00:00:55.515000
1407	00:00:55.554000
1408	00:00:55.594000
1409	00:00:55.633000
1410	00:00:55.673000
1411	00:00:55.712000
1412	00:00:55.752000
1413	00:00:55.791000
1414	00:00:55.831000
1415	00:00:55.870000
1416	00:00:55.910000
1417	00:00:55.949000
1418	00:00:55.989000
1419	00:00:56.028000
1420	00:00:56.068000
1421	00:00:56.107000
1422	00:00:56.147000
1423	00:00:56.186000
1424	00:00:56.226000
1425	00:00:56.265000
1426	00:00:56.305000
1427	00:00:56.344000
1428	00:00:56.384000
1429	00:00:56.423000
1430	00:00:56.463000
1431	00:00:56.502000
1432	00:00:56.542000
1433	00:00:56.581000
1434	00:00:56.621000
1435	00:00:56.660000
1436	00:00:56.700000
1437	00:00:56.739000
1438	00:00:56.779000
1439	00:00:56.819000
1440	00:00:56.858000
1441	00:00:56.898000
1442	00:00:56.937000
1443	00:00:56.977000
1444	00:00:57.016000
1445	00:00:57.055000
1446	00:00:57.095000
1447	00:00:57.135000
1448	00:00:57.174000
1449	00:00:57.214000
1450	00:00:57.253000
1451	00:00:57.293000
1452	00:00:57.332000
1453	00:00:57.372000
1454	00:00:57.411000
1455	00:00:57.451000
1456	00:00:57.490000
1457	00:00:57.530000
1458	00:00:57.569000
1459	00:00:57.609000
1460	00:00:57.648000
1461	00:00:57.688000
1462	00:00:57.727000
1463	00:00:57.767000
1464	00:00:57.806000
1465	00:00:57.846000
1466	00:00:57.885000
1467	00:00:57.925000
1468	00:00:57.964000
1469	00:00:58.004000
1470	00:00:58.043000
1471	00:00:58.083000
1472	00:00:58.122000
1473	00:00:58.162000
1474	00:00:58.201000
1475	00:00:58.241000
1476	00:00:58.280000
1477	00:00:58.320000
1478	00:00:58.359000
1479	00:00:58.399000
1480	00:00:58.438000
1481	00:00:58.478000
1482	00:00:58.517000
1483	00:00:58.557000
1484	00:00:58.597000
1485	00:00:58.636000
1486	00:00:58.676000
1487	00:00:58.715000
1488	00:00:58.755000
1489	00:00:58.794000
1490	00:00:58.834000
1491	00:00:58.873000
1492	00:00:58.913000
1493	00:00:58.952000
1494	00:00:58.992000
1495	00:00:59.031000
1496	00:00:59.071000
1497	00:00:59.110000
1498	00:00:59.150000
1499	00:00:59.189000
1500	00:00:59.229000
1501	00:00:59.268000
1502	00:00:59.308000
1503	00:00:59.347000
1504	00:00:59.387000
1505	00:00:59.426000
1506	00:00:59.466000
1507	00:00:59.505000
1508	00:00:59.545000
1509	00:00:59.584000
1510	00:00:59.624000
1511	00:00:59.663000
1512	00:00:59.703000
1513	00:00:59.742000
1514	00:00:59.782000
1515	00:00:59.821000
1516	00:00:59.861000
1517	00:00:59.900000
